# Supplementary material
Source: PubMed Central journal article supplement (PMC2956502)
Supplement: NIHMS237116-supplement-Supp1.pdf [file NIHMS237116-supplement-Supp1.pdf]

## SUPPLEMENTAL MATERIAL

### Supplemental Methods

#### **Materials and Methods**

All animal protocols conformed to the *Guidelines for the Care and Use of Laboratory Animals* prepared by the National Academy of Sciences and published by the National Institutes of Health, and were approved by the University of Cincinnati Animal Care and Use Committee.

#### **Regional Ischemia *In Vivo***

Male adult mice (10-12 weeks old) were anesthetized with sodium pentobarbital (90 mg/kg IP), intubated with PE 90 tubing, and ventilated by use of a mouse miniventilator (Harvard Apparatus) with room air supplemented with oxygen. ECG electrodes were placed subcutaneously, and data were recorded with a Digi-Med Sinus Rhythm Analyzer (Micro-Med). A lateral thoracotomy (1.5-cm incision between the second and third ribs) was performed to provide exposure of the left anterior descending coronary artery (LAD), while avoiding rib and sternal resection, retraction, and rotation of the heart. Vascular bundles in the vicinity were coagulated by use of a microcoagulator (Medical Industries). An 8-0 nylon suture was placed around the LAD at 2 to 3 mm from the tip of the left auricle, and a piece of soft silicon tubing (0.64 mm ID, 1.19 mm OD) was placed over the artery. All mice were subjected to a 30-minute coronary occlusion by tightening and tying the suture. Ischemia was confirmed by visual observation (cyanosis) and continuous ECG monitoring. After 24 hours of reperfusion, the aorta was cannulated, and the hearts were quick frozen in liquid N<sub>2</sub> for further experiments or perfused with 1% TTC (37°C, 60 mmHg) as previously described.<sup>1,2</sup> The occluder, which had been left in place, was retied, and the heart was perfused with 5% phthalo blue. Hearts were cut into 5 to 6

transverse sections, with 1 section made at the site of the ligature. Infarct sizes were determined and expressed as a percentage of the region at risk.

### **microRNA (miR) Extraction and Quantitative Stem-Loop RT-PCR**

miRs were isolated from mouse hearts (B6129SF2/JF2, 10~12-weeks old) subjected to 30-min ischemia via left anterior descending (LAD) coronary artery occlusion followed by reperfusion for 1h, 4h, or 24h or from mouse hearts (FVB/N) subjected to 45-min no-flow global ischemia and 2-h reperfusion *ex vivo*, using the miRNeasy Mini kit (Qiagen) according to the manufacturer's protocol. The concentration of RNA was determined by a NanoDrop ND-1000 Spectrophotometer (NanoDrop Tech., Rockland, DE). All stem-loop RT reactions (the supplemental Figure S3), including no-template controls and RT minus controls, were run in triplicate in a GeneAmp PCR 9700 Thermocycler (Applied Biosystems). U6 was used as an internal control. Relative expression was calculated using the comparative threshold cycle (Ct) method, as previously described.<sup>1</sup>

### **Generation of a miR-494 Transgenic Mouse Model**

Transgenic (TG) mice (FVB/N) were constructed by using a 372-bp DNA fragment containing murine primary miR-494 DNA under the control of the  $\alpha$ -myosin heavy chain promoter ( $\alpha$ -MHCp). The following primer set including *Sall* and *HindIII* sites (underlined) was used to generate the murine primary miR-494. Forward primer: 5'-CAG AGT CGA CTG TCA AAT TGC ACA G -3'; Reverse primer: 5'-CTGTAAAGCTTAGGGAGTAGCCTCAGGCCAC-3'. Expression levels of miR-494 in TG hearts were detected by Northern blot, as previously described.<sup>1</sup> U6 was used as a loading control to normalize expression levels. MiR-494 probe

sequence: 5'- GAG GTT TCC CGT GTA TGT TTC A-3'; U6 probe sequence: 5'-GCA GGG GCC ATG CTA ATC TTC TCT GTA TCG-3'.

### **Global Ischemia *Ex Vivo* and Cardiac Injury Analysis**

The cellular and functional responses to I/R were assessed in mice using an isolated perfused heart model, as previously described.<sup>1,2</sup> After a 30-min equilibration period, hearts were subjected to 45 min of no-flow global ischemia, followed by 60 min of reperfusion. The left ventricular end diastolic pressure (LVEDP), left ventricular developed pressure (LVDP), maximum rate of contraction (+dP/dt), and maximum rate of relaxation (-dP/dt) were monitored during this process. Cardiac injury was assessed by measuring lactate dehydrogenase (LDH) release. Perfusion effluent was collected every 10 minutes pre-ischemia and also during reperfusion. Total LDH released from the heart was determined using an *in vitro* Toxicology Assay Kit (Sigma) and expressed as units per ml of wet heart weight (U/ml/g). PK/LDH enzyme (Sigma, #P-0294) was used as a standard control. In situ DNA fragmentation was assessed using the DeadEnd Fluorometric TUNEL system (Promega), followed by staining with an anti- $\alpha$ -sarcomeric actin antibody (Sigma-Aldrich) and 4', 6-diamidino-2-phenylindole (DAPI) (Invitrogen).<sup>3</sup> TUNEL-positive (green) nuclei were counted from 10 randomly-chosen microscope fields of the midventricular section and were expressed as a percentage of total nuclei (both blue and green staining nuclei) from the same fields, using five hearts for each group and two sections for each heart. For more accurate quantification of apoptosis in the I/R hearts, DNA fragmentation was determined by a cell-death-detection ELISA kit (Roche Applied Science). Results were normalized to the standard provided in the kit and expressed as a fold increase over control. Caspase-3 activity was determined in cardiac lysates (100  $\mu$ g) using Caspase-3/PPP32 Fluorometric Assay kit (BioVision).

### **Cell Culture and Construction of Adenoviral Vectors**

HEK293 cells were cultured in Dulbecco's Modified Eagle Medium (DMEM), supplemented with 10% fetal bovine serum and 100 µg/ml penicillin/streptomycin. Primary miR-494 DNA was PCR-amplified from mouse genomic DNA using high fidelity AccuPrime Taq DNA polymerase (Invitrogen). After sequencing, the amplified fragment (372 bp) was first subcloned in pcDNA3 (Invitrogen), then inserted under the CMV promoter into the AdEasy-1/Shuttle backbone, similar to our previous construction of adenoviral vectors.<sup>1,4</sup>

### **Preparation and Infection of Adult Rat Cardiomyocytes**

Adult rat ventricular myocytes were isolated from Langendorff-perfused hearts of 6-week-old male Sprague-Dawley rats (Harlan Laboratory) at 37°C, as described before.<sup>1,4-6</sup> Isolated cardiomyocytes were plated on laminin-coated dishes. After 1-2 hours, cardiomyocytes were infected with adenoviruses at a multiplicity of infection of 500 for 2 hours. For detection the expression levels of miR-494 and its target proteins, the cultured rat cardiomyocytes were harvested after 60 hours of adenoviral infection.

### **Simulated Ischemia/Reperfusion Treatment and Cell Survival Assay**

To mimic *in vivo* I/R conditions, adenovirus-infected cardiomyocytes were cultured in ischemia buffer (1.13 mM CaCl<sub>2</sub>, 5 mM KCl, 0.3 mM KH<sub>2</sub>PO<sub>4</sub>, 0.5 mM MgCl<sub>2</sub>, 0.4 mM MgSO<sub>4</sub>, 128 mM NaCl, 4 mM NaHCO<sub>3</sub>, 10 mM HEPES, pH 6.8), and placed into a hypoxic chamber (37°C, 1% O<sub>2</sub>, 20% CO<sub>2</sub> and 79% N<sub>2</sub>) for 1-h, followed by reperfusion for 3-h under normal culture conditions, as previously described.<sup>1</sup> Cardiomyocyte cell viability assessment was performed with the CellTiter 96 AQueous One Solution Cell Proliferation Assay Kit (Promega), per

manufacturer's instructions. DNA fragmentation and caspase-3 activity were determined as described above.

### **Western Blot Analysis**

Protein samples were extracted from hearts or cultured cells, using the procedures described in detail elsewhere.<sup>1,5,7</sup> Protein samples (100µg) were fractionated by SDS-PAGE. Binding of the primary antibody was detected by peroxidase-conjugated secondary antibodies and enhanced chemiluminescence (Amersham). The corresponding bands were quantified by densitometry. The antibodies used in this study were as follows: rabbit anti-ROCK1 (H85) (1:200 dilution), rabbit anti-PTEN (A2B1) (1:300 dilution), rabbit anti-ILF (M179) (1:200 dilution) (Santa Cruz Biotech Inc); rabbit anti-FGFR2 (1:300 dilution), rabbit anti-CaMKIIδ (1:1000 dilution), and rabbit anti-apoptosis inhibitor 5 (Api5) (1:300 dilution) (Abcam Inc); rabbit anti-Akt and its phosphorylation (pS<sup>473</sup>Akt and pT<sup>308</sup>Akt) antibodies (1:1000 dilution), rabbit anti-BAD and its phosphorylation (Ser136) (1:250 dilution), rabbit anti-Bcl-2 and Bcl-xL (1:500 dilution), (Cell Signaling Technology, Inc.). α-actin (1:1000 dilution, Sigma-Aldrich) was used as an internal control.

### **Luciferase Reporter Assay for miR-494 targets**

For luciferase reporter experiments, a ROCK1, PTEN, CAMKIIδ, FGFR2, LIF, or Api5 3'-UTR segment of ~120 bp and its respective mutant was amplified by foot-print two-step PCR (supplemental Figure S1) and inserted into the pMIR-REPORT<sup>TM</sup> luciferase miRNA expression reporter vector (Ambion) at sites of *Spe*I and *Hind*III (supplemental Figure S2). HEK293 cells were cotransfected in 12-well plates using DharmaFECT Duo Transfection Reagent (Thermo Fisher Scientific Inc) according to the protocol of the manufacturer, with 0.4 µg of the 3'-UTR



was performed at the University of Cincinnati Genomics and Microarray Core. The microarray data was analyzed using statistical software R and the limma package of Bioconductor<sup>11</sup> with custom CDF downloaded from the previous literature<sup>12</sup>. Data preprocessing, including background correction and normalization, was performed using RMA. Array quality was assessed using the arrayQualityMetrics package of Bioconductor<sup>13</sup>. Estimated fold change for each comparison was calculated using ANOVA, and resulting t-statistics were modified using an intensity-based empirical Bayes method (IBMT)<sup>14</sup>. Genes with p-value < 0.05 were considered significantly differentially expressed. The list of miR-494 predicted targets was downloaded from TargetScan<sup>15</sup>.

### **Statistical Analysis**

Data are expressed as mean  $\pm$  SD. ANOVA was conducted first across all investigated groups in Fig.3 and Fig. 8C-E. We performed Shapiro-Wilk test for the normality, and there was no evidence of deviation from normality for all variables. Then, Post hoc pairwise tests were performed with assessment of statistical significance after Bonferroni correction of the P values. In these figures, alpha level =0.05, only a p value from pairwise test for each time point less than  $0.05/6=0.008$  would be considered significant.  $P < 0.05$  was considered statistically significant, when Student t-test was used for two-group comparisons in other figures.

### **References**

1. Ren XP, Wu J, Wang X, Sartor MA, Qian J, Jones K, Nicolaou P, Pritchard TJ, Fan GC. MicroRNA-320 is involved in the regulation of cardiac ischemia/reperfusion injury by targeting heat-shock protein 20. *Circulation*. 2009; 119:2357-66.
2. Fan GC, Ren X, Qian J, Yuan Q, Nicolaou P, Wang Y, Jones WK, Chu G, Kranias EG. Novel cardioprotective role of a small heat-shock protein, Hsp20, against ischemia/reperfusion injury. *Circulation* 2005; 111:1792-1799.
3. Fan GC, Yuan Q, Song G, Wang Y, Chen G, Qian J, Zhou X, Lee YJ, Ashraf M, Kranias EG. Small heat-shock protein Hsp20 attenuates beta-agonist-mediated cardiac remodeling through apoptosis signal-regulating kinase 1. *Circ Res*. 2006; 99:1233-1242.
4. Fan GC, Chu G, Mitton B, Song Q, Yuan Q, Kranias EG. Small heat-shock protein Hsp20 phosphorylation inhibits beta-agonist-induced cardiac apoptosis. *Circ Res*. 2004; 94:1474-1482.
5. Wang X, Zhao T, Huang W, Wang T, Qian J, Xu M, Kranias EG, Wang Y, Fan GC. Hsp20-engineered mesenchymal stem cells are resistant to oxidative stress via enhanced activation of Akt and increased secretion of growth factors. *Stem Cells*. 2009;27(12):3021-31.
6. Wang X, Zingarelli B, O'Connor M, Zhang P, Adeyemo A, Kranias EG, Wang Y, Fan GC. Overexpression of Hsp20 prevents endotoxin-induced myocardial dysfunction and apoptosis via inhibition of NF-kappaB activation. *J Mol Cell Cardiol*. 2009; 47(3):382-90.
7. Fan GC, Zhou X, Wang X, Song G, Qian J, Nicolaou P, Chen G, Ren X, Kranias EG. Heat shock protein 20 interacting with phosphorylated Akt reduces doxorubicin-triggered oxidative stress and cardiotoxicity. *Circ Res*. 2008; 103:1270-9.



8. Krützfeldt J, Rajewsky N, Braich R, Rajeev KG, Tuschl T, Manoharan M, Stoffel M. Silencing of microRNAs in vivo with 'antagomirs'. *Nature*. 2005; 438: 685-689.
9. Krützfeldt J, Kuwajima S, Braich R, Rajeev KG, Pena J, Tuschl T, Manoharan M, Stoffel M. Specificity, duplex degradation and subcellular localization of antagomirs. *Nucleic Acids Res*. 2007; 35: 2885-2892.
10. van Rooij E, Sutherland LB, Thatcher JE, DiMaio JM, Naseem RH, Marshall WS, Hill JA, Olson EN. Dysregulation of microRNAs after myocardial infarction reveals a role of miR-29 in cardiac fibrosis. *Proc Natl Acad Sci U S A*. 2008; 105:13027-13032.
11. Smyth, G. K. Linear Models and Empirical Bayes Methods for Assessing Differential Expression in Microarray Experiments. *Statistical Applications in Genetics and Molecular Biology* 3: 2004, Article 3.
12. Dai M, Wang P, Boyd AD, Kostov G, Athey B, Jones EG, Bunney WE, Myers RM, Speed TP, Akil H, Watson SJ, Meng F. Evolving gene/transcript definitions significantly alter the interpretation of GeneChip data. *Nucleic Acids Res*. 2005; 33:e175.
13. Kauffmann A, Gentleman R, Huber W. arrayQualityMetrics--a bioconductor package for quality assessment of microarray data. *Bioinformatics*, 2009, 25(3):415-6.
14. Sartor MA, Tomlinson CR, Wesselkamper SC, Sivaganesan S, Leikauf GD, and Medvedovic M. Intensity-based hierarchical Bayes method improves testing for differentially expressed genes in microarray experiments. *BMC Bioinformatics*, 2006, 7:538,.
15. Robin CF, Kyle KF, Christopher BB, David PB. Most Mammalian mRNAs Are Conserved Targets of MicroRNAs. 2009, *Genome Research*, 19:92-105.

## Supplemental Figures

**Figure S1: Diagram of foot-print two-step PCR**

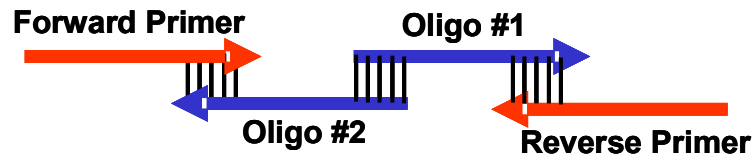

**Step 1:** extend the overlapping oligos (mixture of forward primer, reverse primer, oligo#1, and oligo#2) using Taq under the following conditions: 94° C for 15 s, 55° C for 30 s, 72° C for 50 s, for a total of 5 cycles, then 72° C extension for 5 min.

**Step 2:** Take 2  $\mu$  l of the Step 1 PCR product as template, add the forward primer and reverse primer under same PCR conditions for a total of 30 cycles, then 72° C extension for 5 min.

**Figure S2: Diagram of Luciferase-Reporter Plasmid Construction**

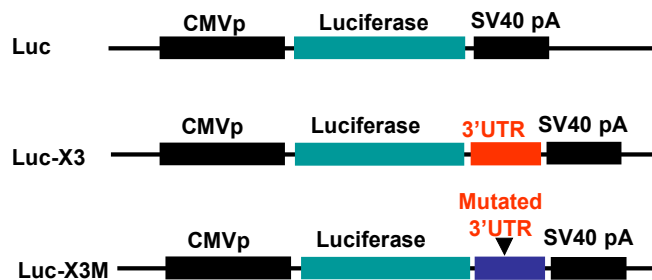

**Figure S2:** A segment of Gene X (ROCK1, PTEN, CaMKII $\delta$ , FGFR2, LIF, and Api5) 3' UTR or its mutated segment was cloned downstream of the luciferase-coding region.

**Figure S3: Diagram of Stem-Loop RT-PCR**

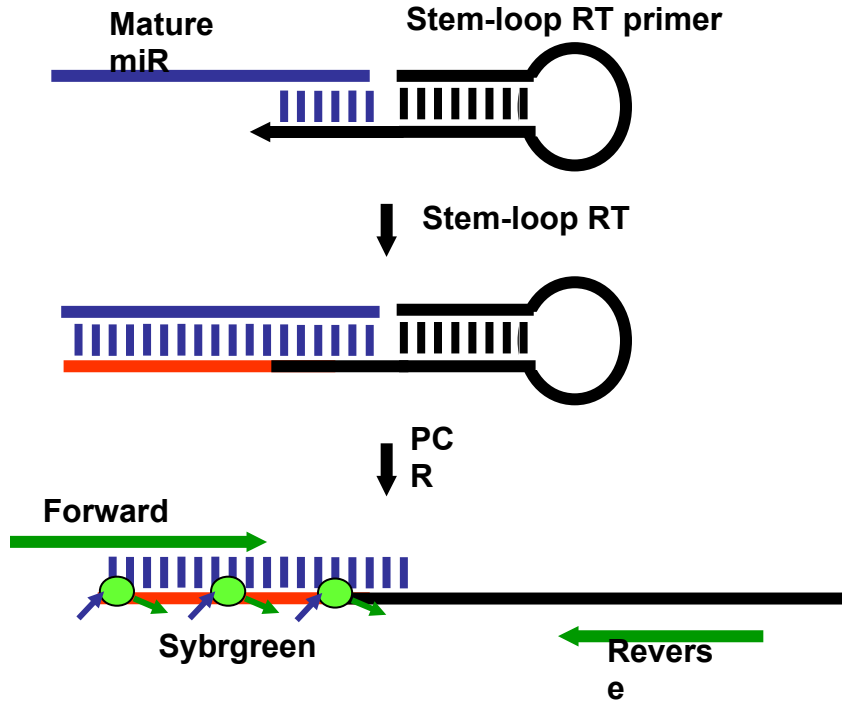

**Supplemental Figure S4**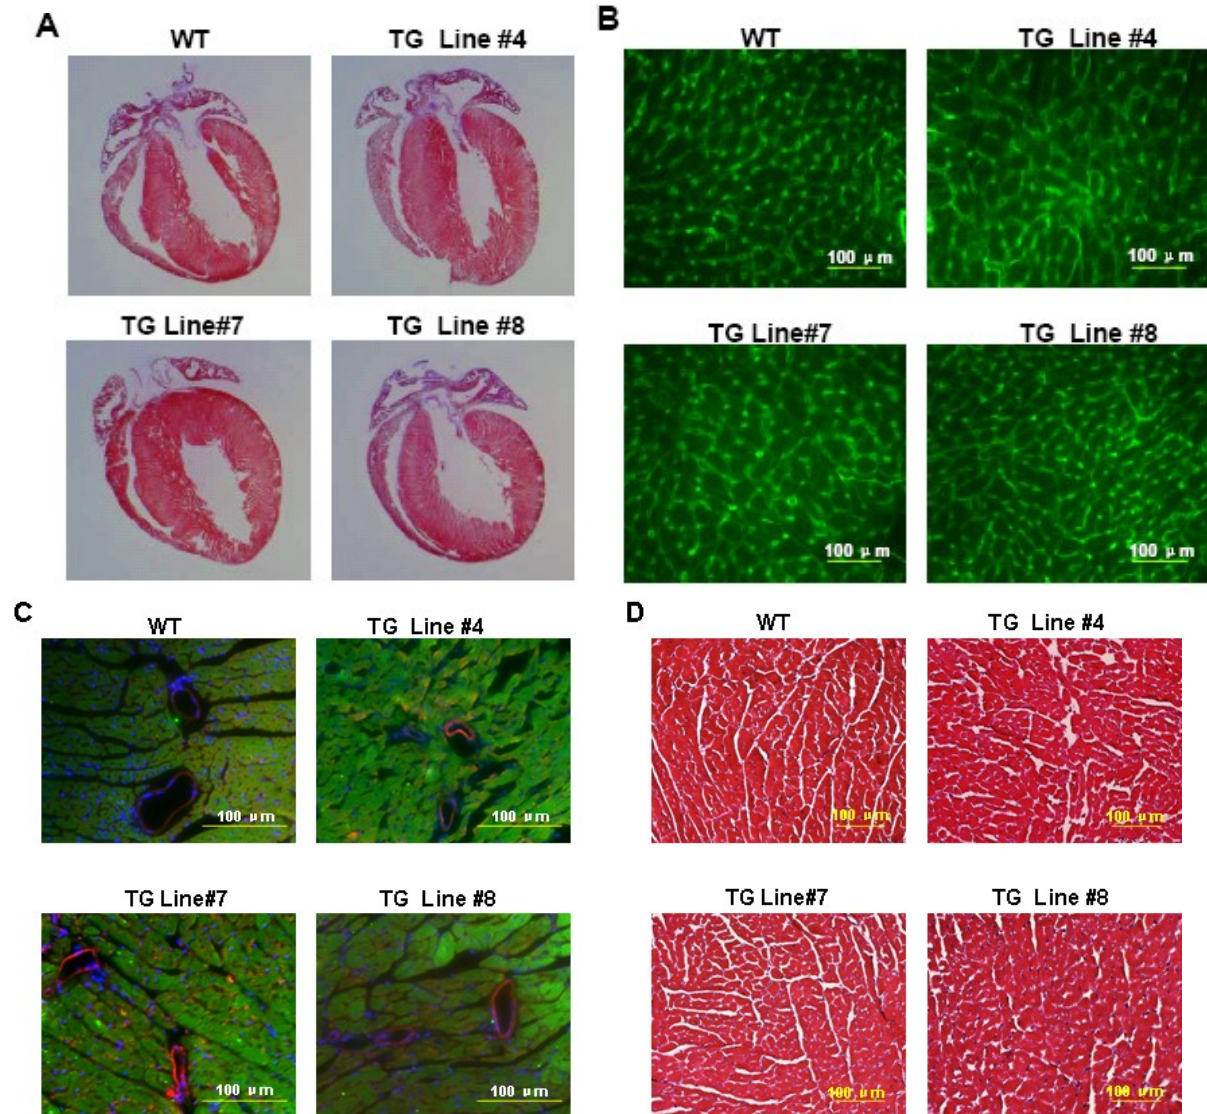

**Figure S4** Models of cardiac-specific overexpression of miR-494 showed no apparent cardiac morphological abnormalities. (A) Representative global heart section photographs from WT and miR-494 TG mice. (B) Immunostaining of heart sections from WT and TG mice with fluorescence labeled wheat germ agglutinin (Oregon Green 488 conjugated WGA, 1:50). (C) Blood vessels were stained for CD-31 (capillary density) in heart sections of WT and miR-494 TG mice. Green:  $\alpha$ -Actin (1:50), Alexa Fluor® 488 goat anti-mouse 2nd Ab (1:250); red: CD31 (1:100, purchased from BioLegend), Alexa Fluor® 594 goat anti-rabbit 2nd Ab (1:250); blue: DAPI. Original magnification: x400. (D) Representative images of Masson's Trichrome staining.

**Supplemental Figure S5**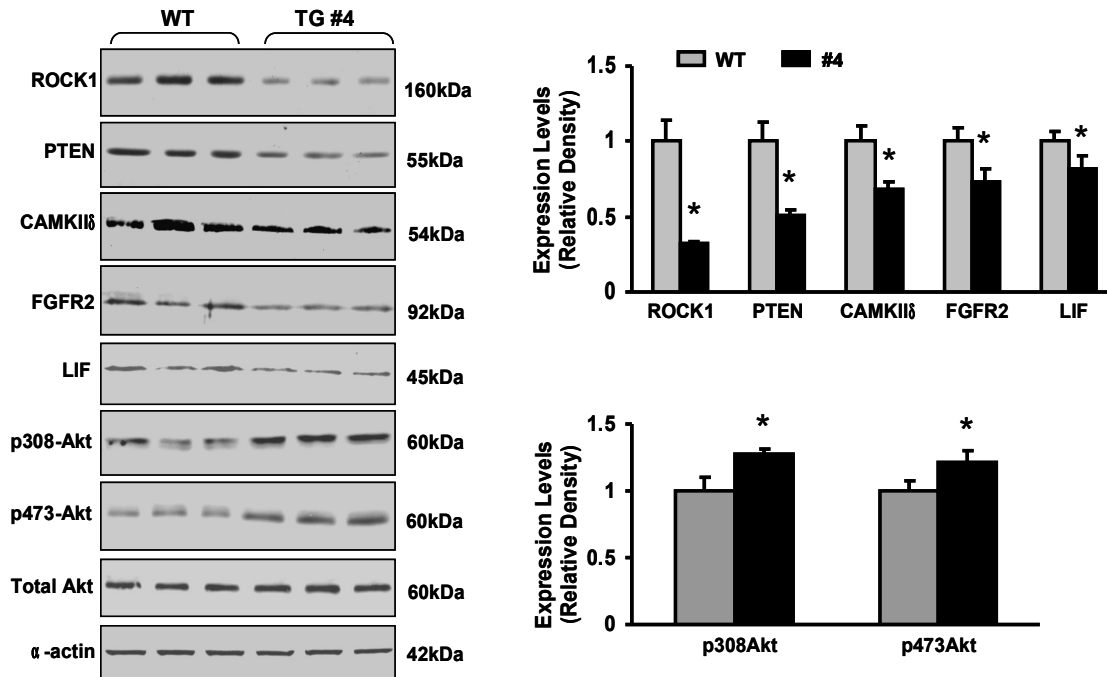

**Figure S5** Overexpression of miR-494 downregulated protein levels of ROCK1, PTEN, CAMKII $\delta$ , FGFR2, and LIF. Consequently, Akt was activated, as evidenced by the increased phosphorylated Akt (T308 and S473).  $n=3$  hearts; \*  $p < 0.05$  vs WT controls.

**Supplemental Figure S6: Sequence alignments of miR-494 and 3'-UTR of PTEN, ROCK1, CAMK2D, FGFR2, LIF, and Api5**

**3'-UTR of PTEN**

|                                   |                                        |
|-----------------------------------|----------------------------------------|
| Position 2800-2806 of PTEN 3' UTR | 5' ...UACCGGCAGCAUCAAAUGUUUC<br>A...   |
| <i>mmu-miR-494</i>                | 3' CUCCAAAGGGCACAUAACAAGU<br>          |
|                                   | .....2780..... 2790.....2800.....2810  |
| Mmu                               | AAGUGGAGUUUACCGGCAGCAUCAAAUGUUUCAGCUUU |
| Hsa                               | AAGUGGAGUUUACCGGCAGCAUCAAAUGUUUCAGCUUU |
| Rno                               | AAGUGGAGUUUACCGGCAGCAUCAAAUGUUUCAGCUUU |
| Cfa                               | AAGUGGAGUUUACCGGCAGCAUCAAAUGUUUCAGCUUU |

**3'-UTR of ROCK1**

|                                    |                                       |
|------------------------------------|---------------------------------------|
| Position 1393-1399 of ROCK1 3' UTR | 5' ...UCUAGGGUGAUAUGCAUGUUUCA...      |
| <i>mmu-miR-494</i>                 | 3' CUCCAAAGGGCACAUAACAAGU<br>         |
|                                    | .....1380.....1390.....1400.....      |
| Mmu                                | CUUCUCUAGGGUGAUA-UGCAUGUUUCAAGUGGUAAU |
| Hsa                                | CGUCUCUAGGAUGAUA-UGCAUGUUUCAAGUGGUAAU |
| Rno                                | CUUCUCUAGGGUGACA-UGCAUGUUUCAAGUGGUAAU |
| Cfa                                | UGUCUCUAGGAUGAUA-UGCAUGUUUCAAGUGGUAAU |

**3'-UTR of CAMK2D**

|                                   |                                                   |
|-----------------------------------|---------------------------------------------------|
| Position 116-122 of CAMK2D 3' UTR | 5' ...CUCUCCUCUUCAUGCAUGUUUCU...                  |
| <i>mmu-miR-494</i>                | 3' CUCCAAAGGGCACAUAACAAGU<br>                     |
|                                   | 100.....110.....120.....130.....140               |
| Mmu                               | CCUCUCCUC---UUCAUGCAUGUU-UCUGAGUGCAUGAAGUUGUGAA   |
| Hsa                               | CCUCUCCUCCUCUUCAUGCAUGUU-UCUGAGUGCAUGAAGUUGUGAA   |
| Rno                               | CCUCUCCUC-----UUCAUGCAUGUU-UCUGAGUGCAUGAAGUUGUGAA |
| Cfa                               | CCUCUCCCC--CUUCAUGCAUGUU-UCUGAGUGCAUGAAGUUGUGAA   |

**3'-UTR of FGFR2**

|                                          |                                              |
|------------------------------------------|----------------------------------------------|
| Position 1446-1452 of FGFR2 3' UTR       | 5' ...AUACUGACAAUAAAAAUGUUUCU...             |
| <i>mmu-miR-494</i>                       | 3' CUCCAAAGGGCACAUACAAAGU                    |
|                                          |                                              |
| 1420.....1430.....1440.....1450.....1460 |                                              |
| Mmu                                      | UGUUAUUUUUUAUACUGACAAUAAAAA-UGUUUCUACAGAUUUA |
| Hsa                                      | UGUUAUUUUUUAUACUGACAAUAAAAA-UGUUUCUACAGAUUUA |
| Rno                                      | UGUUAUUUUUUAUACUGACAAUAAAAA-UGUUUCUACAGAUUUA |
| Cfa                                      | UGUUAUUUUUUAUACUGACAAUAAAAA-UGUUUCUACAGAUUUA |

**3'-UTR of LIF**

|                                           |                                               |
|-------------------------------------------|-----------------------------------------------|
| Position 2934-2940 of LIF 3' UTR          | 5' ...AUGUACCCUGUGGGAUGUUUCA...               |
| <i>mmu-miR-494</i>                        | 3' CUCCAAAGGGCACAUACAAAGU                     |
|                                           |                                               |
| .....2920.....2930.....2940.....2950..... |                                               |
| Mmu                                       | UUUGAUGAAUGUACCCUGUGGGAUGUUUCAUACUGACAGAUUUUU |
| Hsa                                       | UUUGAUGAAUGUACCCUGUGGGAUGUUUCAUACUGACAGAUUUUU |
| Rno                                       | UUUGAUGAAUGUACCCUGUGGGAUGUUUCAUACUGACAGAUUUUU |
| Cfa                                       | UUUGAUGAAUGUACCCUGUGGGAUGUUUCAUACUGACAGAUUUUU |

**3'-UTR of Api5**

|                                   |                                           |
|-----------------------------------|-------------------------------------------|
| Position 1269-1275 of API5 3' UTR | 5' ...CUGUUCUUCAUUUGAUGUUUCA...           |
| <i>mmu-miR-494</i>                | 3' CUCCAAAGGGCACAUACAAAGU                 |
|                                   |                                           |
| .....1260.....1270.....1280.....  |                                           |
| Mmu                               | CUCUGUUCUU-CAUUUGAUGUUU-C--ACACA-UUUUUGUU |
| Hsa                               | CUUUGUUCUG-CAUUUGAUGUUU-C--GUAUA-UUUUUGUU |
| Rno                               | CUCUGUUCUU-CAUUUGAUGUUU-C--AUAAA-UUUUUGUU |
| Cfa                               | CUUUGCUCUG-CAUUCGAAUGUUU-C -UAUA-UUUUUGUU |

**Figure S6:** The putative miR-494-binding sites within these targets are conserved among mammalian species (mouse, human, rat, and dog), where the crucial seed regions are highlighted.

**List of Primers for 3'-UTR Segment (Seed Sequence is Underlined) and miR-494****ROCK1 3'UTR**

Forward: 5'-GAC AAC TAGT GCA GTAATGTGTA TC AAATAAGC AC

Reverse: 5'- CTG TAA GCT T TC AATACCAC

Oligo #1: 5'-GCA TATCACCTAGAGAAGATCGGTTTTCCAGTGCTTATTTGA

Oligo#2: 5'-CTAGGGTGATA TGCATGTTTC AAGTGGTATT GAAAGCMutated Oligo#2: 5'-CTAGGGTGATA TGCTTACCAAT AAGTGGTATT GAAAGC**PTEN 3'UTR**Forward: 5'-GAC A AC TAG T GT CACCATTCTT TGCTGTGGCACReverse: 5'-- CTG T AA GCT T GTAACCTGTAACCTAC

Oligo #1: 5' -GATGCTG CCGGTAAACTCCACTTAAGTTTATAACCTGTGCCACAGC

Oligo #2:

5'- GTTTACCGG CAGCATCAAATGTTTCAGCTTTAAAAATAAAAGTAGGT TAC

Mutated Oligo #2:

5'- GTTTACCGG CAGCATCAAT ACGAGAAGCT TAAAAATAA AAGTAGGTTAC**CaMKIIδ 3'UTR**

Forward: 5'-GAC AAC TAG T CAACAGTGCC ACTTC TTCAT TCTG

Reverse: 5'-- CTG TAA G CT T CAC AAC TTC ATG CAC

Oligo #1:

5'-GTCCCA GGATC ACCCG CCTGGTGCCT TGAGGACAGAATGAAGAAG

Oligo #2:

5'-GATCC TGGGACGTCC TCTCCTCTTC ATGCATGTTT CTGAGTGCATGAAG

Mutated Oligo#2 :

5'-GATCC TGGGACGTCC TCTCCTCTTC ATGCCACTAC ATGAGTGCATGAAG**FGFR2 3'UTR**

Forward: 5' -GACA ACTAGT TGTATGCAGA TTACACTG

Reverse: 5'-CTGT AAGCTTGT TAACATTAAT ATCTGTAGAA ACATTTTTATTGTC

Oligo #1 :

5'- G AGAAAGTATT TAATAAAACC TGTTAATTTT TATACTGACA ATAAAA

ATGTTTC TACAG

Mutated Oligo #1:

5'- G AGAAAGTATT TAATAAAACC TGTTAATTTT TATACTGACA

ATAAAACAGCCACTTACAG

Oligo#2 :

5' -GGTTTTATTA AATACTTTCT CCAATTCCAA AA CACATAAA AT

CAGTGTAATCTGC

**LIF 3'UTR**

Forward: 5'- GACA ACTAGT TGGAAGGGA CTTGGCCTTG

Reverse: 5' - CTGT AAGCTT ATAATCTGTC

Oligo #1: 5'-GAATGTACC CTGTGGGAAT GTTTCATACT GACAGATTAT AAGC



Mutated Oligo #1:

5'-GAATGTACC CTGTGGGACA **CGACT**ATACT GACAGATTAT AAGC

Oligo#2: 5'- CAGGGTACATTCATCAAAGAGGAATTTGTCACCCAAGGCCAAGTC

**Api5 3'UTR**

Forward: 5'-GACA ACTA G TTCGTGGAGT GTCTCATG

Reverse: 5'-CTGT AAGCTTGGA AGATTAAGT TG

Oligo #1: 5'- G ACTCTGTTCT TCATTTGA**ATGTTT**CACACA TTTTTGTTCA  
CAGTTAATCT

Mutated Oligo#1: 5'- GACTCTGTTCT TCATTTG**ACCAACGC**CACACA TTTTTGTTCA  
CAGTTAATCT

Oligo#2: 5'-GAAGCCAGAGT CTGGGCTACT AAAAATGCCCAACAT GAGAC AC

**Stem-Loop RT-PCR Primers for miR-494**

miR-494/stem-loop RT primer:

5'-GTCGTATCCAGTGCAGGGTCCGAGGTATTCGCACTGGATACGAC gaggt—3'

Forward: 5'— GCAGAG tga aac ata cac gg

Reverse: 5' - GTGCAGGGTCCGAGGT-3'

**Supplemental Table S1. Upregulated genes in miR-494 hearts (292, P<0.05)**

| Probe ID  | Gene ID | Symbol        | Name                                                                           | Intensity | Fold  | P value | Std.err |
|-----------|---------|---------------|--------------------------------------------------------------------------------|-----------|-------|---------|---------|
| 20301_at  | 20301   | Ccl27a        | chemokine (C-C motif) ligand 27A                                               | 181.2     | 1.597 | 0.0001  | 0.11    |
| 238756_at | 238756  | Gm4936        | predicted gene 4936                                                            | 81.01     | 1.651 | 0.0002  | 0.12    |
| 258769_at | 258769  | Olfir508      | olfactory receptor 508                                                         | 20.42     | 1.345 | 0.0007  | 0.08    |
| 623475_at | 623475  | Gm6434        | predicted gene 6434                                                            | 43.72     | 1.453 | 0.0009  | 0.1     |
| 629079_at | 629079  | Vmn2r56       | vomeronasal 2, receptor 56                                                     | 24.62     | 1.383 | 0.0016  | 0.1     |
| 258783_at | 258783  | Olfir920      | olfactory receptor 920                                                         | 28.15     | 1.366 | 0.0018  | 0.1     |
| 433216_at | 433216  | Gm5510        | predicted gene 5510                                                            | 40.15     | 1.402 | 0.002   | 0.1     |
| 208111_at | 208111  | C330019L16Rik | RIKEN cDNA C330019L16 gene                                                     | 58.03     | 1.547 | 0.002   | 0.14    |
| 667147_at | 667147  | Gm8481        | ribosomal protein L7a pseudogene                                               | 66.37     | 1.369 | 0.0022  | 0.1     |
| 620078_at | 620078  | C130026I21Rik | RIKEN cDNA C130026I21 gene                                                     | 34.05     | 1.482 | 0.0024  | 0.13    |
| 74568_at  | 74568   | Mlkl          | mixed lineage kinase domain-like                                               | 133.9     | 1.355 | 0.0024  | 0.1     |
| 667597_at | 667597  | BC023105      | cDNA sequence BC023105                                                         | 52.68     | 1.644 | 0.0028  | 0.18    |
| 258752_at | 258752  | Olfir583      | olfactory receptor 583                                                         | 10.41     | 1.4   | 0.0029  | 0.12    |
| 212090_at | 212090  | Tmem60        | transmembrane protein 60                                                       | 148.9     | 1.329 | 0.0035  | 0.1     |
| 66358_at  | 66358   | 2310004I24Rik | RIKEN cDNA 2310004I24 gene                                                     | 235.4     | 1.23  | 0.0035  | 0.08    |
| 171252_at | 171252  | V1rh9         | vomeronasal 1 receptor, H9                                                     | 34.8      | 1.431 | 0.0039  | 0.13    |
| 15957_at  | 15957   | Ifit1         | interferon-induced protein with tetratricopeptide repeats 1                    | 65.54     | 1.346 | 0.0041  | 0.1     |
| 22441_at  | 22441   | Xlr           | X-linked lymphocyte-regulated complex                                          | 33.91     | 1.619 | 0.0042  | 0.18    |
| 225594_at | 225594  | Gm4841        | predicted gene 4841                                                            | 24.69     | 1.261 | 0.005   | 0.08    |
| 66206_at  | 66206   | 1110059E24Rik | RIKEN cDNA 1110059E24 gene                                                     | 248.9     | 1.249 | 0.0053  | 0.09    |
| 665434_at | 665434  | Gm7634        | predicted gene 7634                                                            | 15.87     | 1.346 | 0.0054  | 0.12    |
| 631323_at | 631323  | Gm12250       | predicted gene 12250                                                           | 170.9     | 1.486 | 0.0055  | 0.16    |
| 258898_at | 258898  | Olfir1203     | olfactory receptor 1203                                                        | 17.49     | 1.238 | 0.0057  | 0.08    |
| 628705_at | 628705  | Gm6907        | predicted gene 6907                                                            | 36.86     | 1.396 | 0.0065  | 0.13    |
| 12314_at  | 12314   | Calm2         | calmodulin 2                                                                   | 2248      | 1.184 | 0.0068  | 0.08    |
| 73736_at  | 73736   | Fcf1          | FCF1 small subunit (SSU) processome component homolog ( <i>S. cerevisiae</i> ) | 430.6     | 1.232 | 0.0069  | 0.09    |
| 54123_at  | 54123   | Irf7          | interferon regulatory factor 7                                                 | 132.7     | 1.353 | 0.008   | 0.13    |
| 52653_at  | 52653   | Nudcd2        | NudC domain containing 2                                                       | 582.7     | 1.216 | 0.008   | 0.09    |
| 235459_at | 235459  | Gtf2a2        | general transcription factor II A, 2                                           | 697.3     | 1.177 | 0.0081  | 0.08    |
| 266690_at | 266690  | Cyb5r4        | cytochrome b5 reductase 4                                                      | 405.1     | 1.24  | 0.0086  | 0.1     |
| 76630_at  | 76630   | Stambpl1      | STAM binding protein like 1                                                    | 164.1     | 1.259 | 0.0086  | 0.1     |
| 382236_at | 382236  | Brwd3         | bromodomain and WD repeat domain containing 3                                  | 218.9     | 1.193 | 0.0088  | 0.08    |
| 209786_at | 209786  | Vmn2r-ps88    | vomeronasal 2, receptor, pseudogene 88                                         | 16.67     | 1.297 | 0.0089  | 0.11    |
| 11498_at  | 11498   | Adam4         | a disintegrin and metallopeptidase domain 4                                    | 111.6     | 1.362 | 0.009   | 0.13    |
| 545938_at | 545938  | Zfp607        | zinc finger protein 607                                                        | 142.2     | 1.249 | 0.0095  | 0.09    |
| 76273_at  | 76273   | Ndfip2        | Nedd4 family interacting protein 2                                             | 580.9     | 1.178 | 0.0097  | 0.08    |
| 17993_at  | 17993   | Ndufs4        | NADH dehydrogenase (ubiquinone) Fe-S protein 4                                 | 1885      | 1.21  | 0.0097  | 0.1     |
| 54364_at  | 54364   | Rpp30         | ribonuclease P/MRP 30 subunit (human)                                          | 362       | 1.193 | 0.0098  | 0.08    |

|              |        |               |                                                           |       |       |        |      |
|--------------|--------|---------------|-----------------------------------------------------------|-------|-------|--------|------|
| 319800_at    | 319800 | C730048C13Rik | RIKEN cDNA C730048C13 gene                                | 10.5  | 1.273 | 0.0102 | 0.11 |
| 100041449_at | 1E+08  | Cyp3a59       | cytochrome P450, subfamily 3A, polypeptide 59             | 24.41 | 1.325 | 0.0104 | 0.12 |
| 22717_at     | 22717  | Zfp59         | zinc finger protein 59                                    | 166.2 | 1.364 | 0.0104 | 0.14 |
| 22773_at     | 22773  | Zic3          | zinc finger protein of the cerebellum 3                   | 41.29 | 1.231 | 0.0104 | 0.08 |
| 73233_at     | 73233  | 3110048L19Rik | zinc finger pseudogene                                    | 166.9 | 1.206 | 0.0107 | 0.08 |
| 17022_at     | 17022  | Lum           | lumican                                                   | 1814  | 1.362 | 0.0107 | 0.15 |
| 66202_at     | 66202  | 1110059G10Rik | RIKEN cDNA 1110059G10 gene                                | 246   | 1.208 | 0.0108 | 0.09 |
| 19889_at     | 19889  | Rp2h          | retinitis pigmentosa 2 homolog (human)                    | 327.7 | 1.194 | 0.0108 | 0.08 |
| 68212_at     | 68212  | Tmbim4        | transmembrane BAX inhibitor motif containing 4            | 2065  | 1.156 | 0.0111 | 0.08 |
| 109054_at    | 109054 | Pfdn4         | prefoldin 4                                               | 164.6 | 1.219 | 0.0113 | 0.09 |
| 76561_at     | 76561  | Snx7          | sorting nexin 7                                           | 297.5 | 1.198 | 0.0114 | 0.09 |
| 71538_at     | 71538  | Fbxo9         | f-box protein 9                                           | 537.5 | 1.199 | 0.0114 | 0.09 |
| 20823_at     | 20823  | Ssb           | Sjogren syndrome antigen B                                | 974.4 | 1.16  | 0.0115 | 0.08 |
| 16145_at     | 16145  | Igtp          | interferon gamma induced GTPase                           | 251.1 | 1.616 | 0.0115 | 0.23 |
| 75623_at     | 75623  | 1700029F09Rik | RIKEN cDNA 1700029F09 gene                                | 344.2 | 1.213 | 0.0115 | 0.09 |
| 66226_at     | 66226  | Trappc2       | trafficking protein particle complex 2                    | 1247  | 1.251 | 0.0116 | 0.11 |
| 223499_at    | 223499 | Dcaf13        | DDB1 and CUL4 associated factor 13                        | 389.1 | 1.193 | 0.0117 | 0.09 |
| 97112_at     | 97112  | Nmd3          | NMD3 homolog (S. cerevisiae)                              | 993.4 | 1.172 | 0.0118 | 0.08 |
| 240880_at    | 240880 | Scyl3         | SCY1-like 3 (S. cerevisiae)                               | 220.8 | 1.223 | 0.0119 | 0.09 |
| 664952_at    | 664952 | Gm7422        | predicted gene 7422                                       | 25.56 | 1.313 | 0.0126 | 0.12 |
| 100043759_at | 1E+08  | Gm14335       | predicted gene 14335                                      | 81.29 | 1.451 | 0.0126 | 0.17 |
| 22700_at     | 22700  | Zfp40         | zinc finger protein 40                                    | 110.6 | 1.256 | 0.0131 | 0.1  |
| 269831_at    | 269831 | Tspan12       | tetraspanin 12                                            | 1507  | 1.188 | 0.0131 | 0.09 |
| 73112_at     | 73112  | 3110003A17Rik | RIKEN cDNA 3110003A17 gene                                | 638.2 | 1.663 | 0.0134 | 0.25 |
| 106869_at    | 106869 | Tnfaip8       | tumor necrosis factor, alpha-induced protein 8            | 580.5 | 1.225 | 0.0136 | 0.1  |
| 15401_at     | 15401  | Hoxa4         | homeo box A4                                              | 135.5 | 1.194 | 0.0138 | 0.08 |
| 72748_at     | 72748  | Hdhd3         | haloacid dehalogenase-like hydrolase domain containing 3  | 170.9 | 1.276 | 0.0141 | 0.12 |
| 258924_at    | 258924 | Olfir376      | olfactory receptor 376                                    | 14.13 | 1.227 | 0.0148 | 0.1  |
| 19167_at     | 19167  | Psma3         | proteasome (prosome, macropain) subunit, alpha type 3     | 434.8 | 1.212 | 0.0148 | 0.1  |
| 636177_at    | 636177 | Rhox4f        | reproductive homeobox 4F                                  | 30.72 | 1.46  | 0.0151 | 0.18 |
| 12540_at     | 12540  | Cdc42         | cell division cycle 42 homolog (S. cerevisiae)            | 5273  | 1.132 | 0.0151 | 0.08 |
| 66836_at     | 66836  | Tmem223       | transmembrane protein 223                                 | 1991  | 1.161 | 0.0157 | 0.09 |
| 13110_at     | 13110  | Cyp2j6        | cytochrome P450, family 2, subfamily j, polypeptide 6     | 231.9 | 1.194 | 0.0158 | 0.09 |
| 71690_at     | 71690  | Esm1          | endothelial cell-specific molecule 1                      | 77.2  | 1.23  | 0.0158 | 0.09 |
| 546500_at    | 546500 | Gm12211       | ribosomal protein L9 pseudogene                           | 27.38 | 1.271 | 0.0166 | 0.11 |
| 67168_at     | 67168  | Lpar6         | lysophosphatidic acid receptor 6                          | 527.5 | 1.32  | 0.0166 | 0.15 |
| 56221_at     | 56221  | Ccl24         | chemokine (C-C motif) ligand 24                           | 147.9 | 1.215 | 0.0166 | 0.09 |
| 26888_at     | 26888  | Clec4a2       | C-type lectin domain family 4, member a2                  | 39.5  | 1.271 | 0.0167 | 0.11 |
| 237411_at    | 237411 | B230315N10Rik | RIKEN cDNA B230315N10 gene                                | 1298  | 1.169 | 0.0168 | 0.09 |
| 15042_at     | 15042  | H2-T24        | histocompatibility 2, T region locus 24                   | 364.3 | 1.208 | 0.0168 | 0.1  |
| 66061_at     | 66061  | Tctex1d2      | Tctex1 domain containing 2                                | 199.9 | 1.218 | 0.0169 | 0.1  |
| 19106_at     | 19106  | Eif2ak2       | eukaryotic translation initiation factor 2-alpha kinase 2 | 240.3 | 1.193 | 0.0172 | 0.09 |

|           |        |               |                                                                  |       |       |        |      |
|-----------|--------|---------------|------------------------------------------------------------------|-------|-------|--------|------|
| 257956_at | 257956 | Olf1307       | olfactory receptor 1307                                          | 13.25 | 1.25  | 0.0172 | 0.11 |
| 227615_at | 227615 | C730025P13Rik | RIKEN cDNA C730025P13 gene                                       | 418.9 | 1.169 | 0.0173 | 0.08 |
| 449631_at | 449631 | Gm5775        | predicted gene 5775                                              | 280.7 | 1.184 | 0.0176 | 0.09 |
| 18968_at  | 18968  | Pola1         | polymerase (DNA directed), alpha 1                               | 180.1 | 1.177 | 0.0179 | 0.08 |
| 19988_at  | 19988  | Rpl6          | ribosomal protein L6                                             | 98.49 | 1.251 | 0.018  | 0.1  |
| 16616_at  | 16616  | Klk1b21       | kallikrein 1-related peptidase b21                               | 26.47 | 1.327 | 0.0182 | 0.14 |
| 107701_at | 107701 | Sf3b4         | splicing factor 3b, subunit 4                                    | 93.19 | 1.256 | 0.0185 | 0.11 |
| 383619_at | 383619 | Aim2          | absent in melanoma 2                                             | 90.3  | 1.245 | 0.0185 | 0.1  |
| 630294_at | 630294 | H2-t9         | MHC class Ib T9                                                  | 29.23 | 1.477 | 0.0187 | 0.2  |
| 22381_at  | 22381  | Wbp5          | WW domain binding protein 5                                      | 303.3 | 1.376 | 0.0187 | 0.17 |
| 214804_at | 214804 | Syde2         | synapse defective 1, Rho GTPase, homolog 2 (C. elegans)          | 583.2 | 1.154 | 0.0187 | 0.08 |
| 66310_at  | 66310  | Dpy30         | dpy-30 homolog (C. elegans)                                      | 863.4 | 1.164 | 0.0194 | 0.09 |
| 13482_at  | 13482  | Dpp4          | dipeptidylpeptidase 4                                            | 231.3 | 1.281 | 0.0194 | 0.13 |
| 68735_at  | 68735  | Mrps18c       | mitochondrial ribosomal protein S18C                             | 3086  | 1.144 | 0.0197 | 0.09 |
| 56220_at  | 56220  | Zfp386        | zinc finger protein 386 (Kruppel-like)                           | 557   | 1.151 | 0.02   | 0.08 |
| 330908_at | 330908 | Opcml         | opioid binding protein/cell adhesion molecule-like               | 68.33 | 1.239 | 0.0203 | 0.1  |
| 258659_at | 258659 | Olf1732       | olfactory receptor 732                                           | 27.08 | 1.219 | 0.0207 | 0.09 |
| 66195_at  | 66195  | Lce1g         | late cornified envelope 1G                                       | 12.29 | 1.178 | 0.0208 | 0.08 |
| 68036_at  | 68036  | Zfp706        | zinc finger protein 706                                          | 700.9 | 1.165 | 0.0211 | 0.09 |
| 68404_at  | 68404  | Nrn1          | neuritin 1                                                       | 138.9 | 1.379 | 0.0215 | 0.17 |
| 59048_at  | 59048  | C1galt1c1     | C1GALT1-specific chaperone 1                                     | 386.1 | 1.16  | 0.0216 | 0.08 |
| 101772_at | 101772 | Ano1          | anoctamin 1, calcium activated chloride channel                  | 195.8 | 1.175 | 0.0218 | 0.08 |
| 258089_at | 258089 | Olf1304       | olfactory receptor 304                                           | 11.28 | 1.185 | 0.022  | 0.09 |
| 338346_at | 338346 | Gpr21         | G protein-coupled receptor 21                                    | 76.25 | 1.286 | 0.022  | 0.12 |
| 17936_at  | 17936  | Nab1          | Ngfi-A binding protein 1                                         | 533   | 1.166 | 0.0221 | 0.09 |
| 620603_at | 620603 | Gm6166        | predicted gene 6166                                              | 472.4 | 1.366 | 0.0223 | 0.17 |
| 228094_at | 228094 | Cerkl         | ceramide kinase-like                                             | 32.65 | 1.203 | 0.0225 | 0.09 |
| 67371_at  | 67371  | Gtf3c6        | general transcription factor IIIC, polypeptide 6, alpha          | 453.2 | 1.174 | 0.0227 | 0.09 |
| 258519_at | 258519 | Olf1859       | olfactory receptor 859                                           | 18.24 | 1.254 | 0.023  | 0.12 |
| 621080_at | 621080 | AI429214      | expressed sequence AI429214                                      | 32.34 | 1.259 | 0.0231 | 0.12 |
| 668724_at | 668724 | Gm9320        | predicted gene 9320                                              | 3469  | 1.224 | 0.0232 | 0.12 |
| 233276_at | 233276 | Tubgcp5       | tubulin, gamma complex associated protein 5                      | 225.7 | 1.168 | 0.0235 | 0.08 |
| 67628_at  | 67628  | Anp32b        | acidic (leucine-rich) nuclear phosphoprotein 32 family, member B | 2286  | 1.202 | 0.0236 | 0.11 |
| 52700_at  | 52700  | Txndc17       | thioredoxin domain containing 17                                 | 1214  | 1.15  | 0.0236 | 0.09 |
| 331004_at | 331004 | Slc9a9        | solute carrier family 9 (sodium/hydrogen exchanger), member 9    | 218.5 | 1.236 | 0.0237 | 0.12 |
| 19941_at  | 19941  | Rpl26         | ribosomal protein L26                                            | 1350  | 1.182 | 0.0237 | 0.1  |
| 217578_at | 217578 | Baz1a         | bromodomain adjacent to zinc finger domain 1A                    | 207.8 | 1.191 | 0.0244 | 0.09 |
| 228662_at | 228662 | Btbd3         | BTB (POZ) domain containing 3                                    | 461.2 | 1.161 | 0.0247 | 0.09 |
| 241732_at | 241732 | Tspyl3        | TSPY-like 3                                                      | 107.4 | 1.24  | 0.025  | 0.11 |
| 74245_at  | 74245  | Ctbs          | chitinase, di-N-acetyl-                                          | 138.9 | 1.168 | 0.0253 | 0.08 |
| 68705_at  | 68705  | Gtf2f2        | general transcription factor IIF, polypeptide 2                  | 179   | 1.166 | 0.0253 | 0.08 |
| 224585_at | 224585 | Zfp160        | zinc finger protein 160                                          | 267.4 | 1.173 | 0.0253 | 0.09 |

|           |        |               |                                                                      |       |       |        |      |
|-----------|--------|---------------|----------------------------------------------------------------------|-------|-------|--------|------|
| 67606_at  | 67606  | Fibin         | fin bud initiation factor homolog (zebrafish)                        | 245.1 | 1.374 | 0.0254 | 0.18 |
| 66440_at  | 66440  | Cdc26         | cell division cycle 26                                               | 918.5 | 1.141 | 0.0254 | 0.08 |
| 67005_at  | 67005  | Polr3k        | polymerase (RNA) III (DNA directed) polypeptide K                    | 337.3 | 1.157 | 0.0255 | 0.08 |
| 16182_at  | 16182  | Il18r1        | interleukin 18 receptor 1                                            | 26.94 | 1.229 | 0.0258 | 0.11 |
| 404308_at | 404308 | Olf1r118      | olfactory receptor 118                                               | 23.77 | 1.239 | 0.0259 | 0.11 |
| 211550_at | 211550 | Tifa          | TRAF-interacting protein with forkhead-associated domain             | 111.5 | 1.224 | 0.026  | 0.1  |
| 258606_at | 258606 | Olf1r973      | olfactory receptor 973                                               | 12.95 | 1.166 | 0.026  | 0.08 |
| 66787_at  | 66787  | 4933433P14Rik | RIKEN cDNA 4933433P14 gene                                           | 319.7 | 1.154 | 0.0262 | 0.08 |
| 13051_at  | 13051  | Cx3cr1        | chemokine (C-X3-C) receptor 1                                        | 217   | 1.219 | 0.0262 | 0.11 |
| 666113_at | 666113 | Gm7935        | predicted gene 7935                                                  | 130   | 1.273 | 0.0263 | 0.13 |
| 107868_at | 107868 | Usp9y         | ubiquitin specific peptidase 9, Y chromosome                         | 14.73 | 1.193 | 0.0264 | 0.09 |
| 13197_at  | 13197  | Gadd45a       | growth arrest and DNA-damage-inducible 45 alpha                      | 668.4 | 1.174 | 0.0264 | 0.1  |
| 269623_at | 269623 | C030048B08Rik | RIKEN cDNA C030048B08 gene                                           | 233.5 | 1.154 | 0.0266 | 0.08 |
| 73692_at  | 73692  | 2410089E03Rik | RIKEN cDNA 2410089E03 gene                                           | 258.7 | 1.166 | 0.0267 | 0.09 |
| 16653_at  | 16653  | Kras          | v-Ki-ras2 Kirsten rat sarcoma viral oncogene homolog                 | 715.3 | 1.141 | 0.0267 | 0.08 |
| 241226_at | 241226 | Itga8         | integrin alpha 8                                                     | 177.4 | 1.207 | 0.0268 | 0.1  |
| 11958_at  | 11958  | Atp5k         | ATP synthase, H+ transporting, mitochondrial F1F0 complex, subunit e | 1275  | 1.152 | 0.0269 | 0.09 |
| 22169_at  | 22169  | Cmpk2         | cytidine monophosphate (UMP-CMP) kinase 2, mitochondrial             | 117.2 | 1.351 | 0.0271 | 0.17 |
| 67775_at  | 67775  | Rtp4          | receptor transporter protein 4                                       | 214.3 | 1.269 | 0.0274 | 0.13 |
| 625534_at | 625534 | Gm6597        | predicted gene 6597                                                  | 22.6  | 1.253 | 0.0274 | 0.12 |
| 66403_at  | 66403  | Asf1a         | ASF1 anti-silencing function 1 homolog A (S. cerevisiae)             | 423.4 | 1.148 | 0.0275 | 0.08 |
| 22327_at  | 22327  | Vbp1          | von Hippel-Lindau binding protein 1                                  | 825.5 | 1.168 | 0.0279 | 0.09 |
| 210162_at | 210162 | Zkscan2       | zinc finger with KRAB and SCAN domains 2                             | 47.48 | 1.183 | 0.0281 | 0.08 |
| 12571_at  | 12571  | Cdk6          | cyclin-dependent kinase 6                                            | 485.9 | 1.171 | 0.0282 | 0.09 |
| 67980_at  | 67980  | Gnpda2        | glucosamine-6-phosphate deaminase 2                                  | 264.5 | 1.191 | 0.0284 | 0.1  |
| 234086_at | 234086 | Erich1        | glutamate-rich 1                                                     | 175.8 | 1.174 | 0.0286 | 0.09 |
| 50933_at  | 50933  | Uchl3         | ubiquitin carboxyl-terminal esterase L3 (ubiquitin thiolesterase)    | 965.8 | 1.217 | 0.0287 | 0.12 |
| 72560_at  | 72560  | Naalad2       | N-acetylated alpha-linked acidic dipeptidase 2                       | 299.1 | 1.258 | 0.0288 | 0.13 |
| 259148_at | 259148 | Olf1r329      | olfactory receptor 329                                               | 13.26 | 1.211 | 0.029  | 0.11 |
| 66200_at  | 66200  | Commd6        | COMM domain containing 6                                             | 472.3 | 1.2   | 0.0292 | 0.11 |
| 24110_at  | 24110  | Usp18         | ubiquitin specific peptidase 18                                      | 127   | 1.181 | 0.0292 | 0.09 |
| 56517_at  | 56517  | Slc22a21      | solute carrier family 22 (organic cation transporter), member 21     | 53.5  | 1.202 | 0.0293 | 0.09 |
| 16617_at  | 16617  | Klk1b24       | kallikrein 1-related peptidase b24                                   | 36.49 | 1.221 | 0.0296 | 0.1  |
| 77604_at  | 77604  | C430048L16Rik | RIKEN cDNA C430048L16 gene                                           | 646   | 1.196 | 0.0296 | 0.11 |
| 77805_at  | 77805  | Esco1         | establishment of cohesion 1 homolog 1 (S. cerevisiae)                | 347.1 | 1.153 | 0.0296 | 0.08 |
| 17763_at  | 17763  | Mtcp1         | mature T-cell proliferation 1                                        | 275.6 | 1.152 | 0.0296 | 0.08 |
| 66140_at  | 66140  | Fam33a        | family with sequence similarity 33, member A                         | 890.1 | 1.135 | 0.0297 | 0.08 |
| 235956_at | 235956 | Zfp825        | zinc finger protein 825                                              | 288.3 | 1.188 | 0.0301 | 0.1  |
| 67698_at  | 67698  | Fam174a       | family with sequence similarity 174, member A                        | 689.5 | 1.154 | 0.0303 | 0.09 |
| 18108_at  | 18108  | Nmt2          | N-myristoyltransferase 2                                             | 367.2 | 1.176 | 0.0303 | 0.1  |

|              |        |               |                                                                                               |       |       |        |      |
|--------------|--------|---------------|-----------------------------------------------------------------------------------------------|-------|-------|--------|------|
| 20585_at     | 20585  | Hltf          | helicase-like transcription factor                                                            | 314   | 1.155 | 0.0306 | 0.08 |
| 66695_at     | 66695  | Aspn          | asporin                                                                                       | 1487  | 1.329 | 0.0308 | 0.17 |
| 75698_at     | 75698  | Fam35a        | family with sequence similarity 35, member A                                                  | 152.2 | 1.188 | 0.0312 | 0.09 |
| 20639_at     | 20639  | Snrpb2        | U2 small nuclear ribonucleoprotein B                                                          | 1066  | 1.137 | 0.0312 | 0.08 |
| 217558_at    | 217558 | G2e3          | G2/M-phase specific E3 ubiquitin ligase                                                       | 229   | 1.15  | 0.0315 | 0.08 |
| 77951_at     | 77951  | Cyp20a1       | cytochrome P450, family 20, subfamily A, polypeptide 1                                        | 365.7 | 1.153 | 0.0317 | 0.08 |
| 27528_at     | 27528  | D0H4S114      | DNA segment, human D4S114                                                                     | 488.1 | 1.253 | 0.032  | 0.14 |
| 435766_at    | 435766 | Tnni3k        | TNNI3 interacting kinase                                                                      | 803.6 | 1.134 | 0.0324 | 0.08 |
| 66143_at     | 66143  | Eef1e1        | eukaryotic translation elongation factor 1 epsilon 1                                          | 657.4 | 1.198 | 0.0324 | 0.11 |
| 59029_at     | 59029  | Psmid14       | proteasome (prosome, macropain) 26S subunit, non-ATPase, 14                                   | 1244  | 1.141 | 0.0327 | 0.09 |
| 229782_at    | 229782 | Slc35a3       | solute carrier family 35 (UDP-N-acetylglucosamine (UDP-GlcNAc) transporter), member 3         | 521.5 | 1.134 | 0.0327 | 0.08 |
| 56515_at     | 56515  | Rnf138        | ring finger protein 138                                                                       | 229.3 | 1.152 | 0.0328 | 0.08 |
| 218294_at    | 218294 | Cdc14b        | CDC14 cell division cycle 14 homolog B ( <i>S. cerevisiae</i> )                               | 560.7 | 1.152 | 0.0329 | 0.09 |
| 69149_at     | 69149  | Kbtbd3        | kelch repeat and BTB (POZ) domain containing 3                                                | 141.2 | 1.248 | 0.0331 | 0.13 |
| 114893_at    | 114893 | Dcun1d1       | DCN1, defective in cullin neddylation 1, domain containing 1 ( <i>S. cerevisiae</i> )         | 1019  | 1.14  | 0.0333 | 0.09 |
| 238693_at    | 238693 | Zfp58         | zinc finger protein 58                                                                        | 97.99 | 1.217 | 0.0336 | 0.11 |
| 69792_at     | 69792  | Med6          | mediator of RNA polymerase II transcription, subunit 6 homolog (yeast)                        | 359.2 | 1.152 | 0.0337 | 0.09 |
| 70611_at     | 70611  | Fbxo33        | F-box protein 33                                                                              | 199.5 | 1.18  | 0.0338 | 0.1  |
| 54394_at     | 54394  | Crif3         | cytokine receptor-like factor 3                                                               | 412.9 | 1.163 | 0.0339 | 0.09 |
| 68262_at     | 68262  | Agpat4        | 1-acylglycerol-3-phosphate O-acyltransferase 4 (lysophosphatidic acid acyltransferase, delta) | 94.35 | 1.188 | 0.0342 | 0.09 |
| 622486_at    | 622486 | Smok3c        | sperm motility kinase 3C                                                                      | 26.88 | 1.226 | 0.0343 | 0.11 |
| 387512_at    | 387512 | Tas2r135      | taste receptor, type 2, member 135                                                            | 61.28 | 1.21  | 0.0343 | 0.1  |
| 20104_at     | 20104  | Rps6          | ribosomal protein S6                                                                          | 153.9 | 1.419 | 0.0345 | 0.21 |
| 66209_at     | 66209  | 1110054O05Rik | RIKEN cDNA 1110054O05 gene                                                                    | 261.2 | 1.194 | 0.0345 | 0.11 |
| 280668_at    | 280668 | Adam1a        | a disintegrin and metallopeptidase domain 1a                                                  | 123.4 | 1.224 | 0.0346 | 0.11 |
| 319189_at    | 319189 | Hist2h2bb     | histone cluster 2, H2bb                                                                       | 124.5 | 1.186 | 0.0348 | 0.09 |
| 71911_at     | 71911  | Bdh1          | 3-hydroxybutyrate dehydrogenase, type 1                                                       | 1780  | 1.194 | 0.0348 | 0.11 |
| 67529_at     | 67529  | Fgfr1op2      | FGFR1 oncogene partner 2                                                                      | 525.7 | 1.129 | 0.0348 | 0.08 |
| 381535_at    | 381535 | Gm12800       | predicted gene 12800                                                                          | 12.19 | 1.172 | 0.0351 | 0.09 |
| 100040853_at | 1E+08  | LOC100040853  | CASP8 and FADD-like apoptosis regulator pseudogene                                            | 244.2 | 1.257 | 0.0353 | 0.14 |
| 74653_at     | 74653  | 4930444A02Rik | RIKEN cDNA 4930444A02 gene                                                                    | 253.4 | 1.148 | 0.0354 | 0.08 |
| 26611_at     | 26611  | Rcn2          | reticulocalbin 2                                                                              | 548.7 | 1.132 | 0.0356 | 0.08 |
| 381481_at    | 381481 | Samd13        | sterile alpha motif domain containing 13                                                      | 85.18 | 1.6   | 0.0359 | 0.28 |
| 73300_at     | 73300  | 1700031F05Rik | RIKEN cDNA 1700031F05 gene                                                                    | 81.05 | 1.253 | 0.0364 | 0.13 |
| 18295_at     | 18295  | Ogn           | osteo glycin                                                                                  | 1376  | 1.207 | 0.0364 | 0.12 |
| 12269_at     | 12269  | C4bp          | complement component 4 binding protein                                                        | 29.73 | 1.203 | 0.0364 | 0.1  |
| 20620_at     | 20620  | Plk2          | polo-like kinase 2 ( <i>Drosophila</i> )                                                      | 590.8 | 1.144 | 0.0364 | 0.09 |
| 171209_at    | 171209 | Accn3         | amiloride-sensitive cation channel 3                                                          | 56.52 | 1.213 | 0.0366 | 0.1  |
| 93765_at     | 93765  | Ube2n         | ubiquitin-conjugating enzyme E2N                                                              | 421.7 | 1.189 | 0.0369 | 0.11 |

|           |        |               |                                                                         |       |       |        |      |
|-----------|--------|---------------|-------------------------------------------------------------------------|-------|-------|--------|------|
| 18193_at  | 18193  | Nsd1          | nuclear receptor-binding SET-domain protein 1                           | 915.9 | 1.121 | 0.0376 | 0.08 |
| 58521_at  | 58521  | Eid1          | EP300 interacting inhibitor of differentiation 1                        | 552   | 1.146 | 0.0381 | 0.09 |
| 54561_at  | 54561  | Nap1l3        | nucleosome assembly protein 1-like 3                                    | 54.13 | 1.194 | 0.0381 | 0.09 |
| 252837_at | 252837 | Ccr1l         | chemokine (C-C motif) receptor-like 1                                   | 169.8 | 1.259 | 0.0382 | 0.14 |
| 432760_at | 432760 | Gm5449        | small nuclear ribonucleoprotein D2 pseudogene                           | 21.42 | 1.184 | 0.0383 | 0.09 |
| 15953_at  | 15953  | lfi47         | interferon gamma inducible protein 47                                   | 223.3 | 1.888 | 0.0384 | 0.4  |
| 434394_at | 434394 | Gm5614        | predicted gene 5614                                                     | 130.1 | 1.182 | 0.0387 | 0.09 |
| 17141_at  | 17141  | Magea5        | melanoma antigen, family A, 5                                           | 9.663 | 1.27  | 0.0387 | 0.15 |
| 97884_at  | 97884  | B3galnt2      | UDP-GalNAc:betaGlcNAc beta 1,3-galactosaminyltransferase, polypeptide 2 | 935   | 1.151 | 0.0389 | 0.09 |
| 76983_at  | 76983  | Scfd1         | Sec1 family domain containing 1                                         | 430.6 | 1.143 | 0.0389 | 0.08 |
| 546511_at | 546511 | Gm11555       | predicted gene 11555                                                    | 692.2 | 1.32  | 0.0392 | 0.18 |
| 319615_at | 319615 | 6330416L07Rik | RIKEN cDNA 6330416L07 gene                                              | 123.4 | 1.236 | 0.0392 | 0.12 |
| 69215_at  | 69215  | Sat2          | spermidine/spermine N1-acetyl transferase 2                             | 126.7 | 1.169 | 0.0392 | 0.09 |
| 98363_at  | 98363  | Efhd1         | EF hand domain containing 1                                             | 163.3 | 1.22  | 0.0394 | 0.12 |
| 30057_at  | 30057  | Timm8b        | translocase of inner mitochondrial membrane 8 homolog b (yeast)         | 1215  | 1.161 | 0.0395 | 0.1  |
| 67636_at  | 67636  | Lym5          | LYR motif containing 5                                                  | 1290  | 1.163 | 0.0395 | 0.1  |
| 245282_at | 245282 | Apol10a       | apolipoprotein L 10a                                                    | 19.25 | 1.181 | 0.0396 | 0.1  |
| 56382_at  | 56382  | Rab9          | RAB9, member RAS oncogene family                                        | 209.1 | 1.166 | 0.0396 | 0.09 |
| 67693_at  | 67693  | 2310003F16Rik | RIKEN cDNA 2310003F16 gene                                              | 2102  | 1.141 | 0.0398 | 0.09 |
| 624866_at | 624866 | Gm6534        | predicted gene 6534                                                     | 218.5 | 1.173 | 0.04   | 0.1  |
| 98258_at  | 98258  | Txndc9        | thioredoxin domain containing 9                                         | 636.5 | 1.138 | 0.04   | 0.09 |
| 13136_at  | 13136  | Cd55          | CD55 antigen                                                            | 171.6 | 1.279 | 0.0401 | 0.15 |
| 74492_at  | 74492  | 5430433E21Rik | RIKEN cDNA 5430433E21 gene                                              | 50.54 | 1.208 | 0.0401 | 0.1  |
| 327959_at | 327959 | Xaf1          | XIAP associated factor 1                                                | 128.7 | 1.236 | 0.0403 | 0.13 |
| 69069_at  | 69069  | 1810011H11Rik | RIKEN cDNA 1810011H11 gene                                              | 92.65 | 1.303 | 0.0404 | 0.16 |
| 21399_at  | 21399  | Tcea1         | transcription elongation factor A (SII) 1                               | 1570  | 1.118 | 0.0405 | 0.08 |
| 212898_at | 212898 | Dse           | dermatan sulfate epimerase                                              | 302.4 | 1.212 | 0.0406 | 0.12 |
| 107350_at | 107350 | AW112010      | expressed sequence AW112010                                             | 396.2 | 1.37  | 0.0407 | 0.2  |
| 14727_at  | 14727  | Gp49a         | glycoprotein 49 A                                                       | 105.2 | 1.192 | 0.0407 | 0.1  |
| 630499_at | 630499 | Gm7035        | predicted gene 7035                                                     | 66.04 | 1.226 | 0.0408 | 0.11 |
| 245575_at | 245575 | Gm4992        | predicted gene 4992                                                     | 211.2 | 1.264 | 0.041  | 0.15 |
| 15959_at  | 15959  | lfit3         | interferon-induced protein with tetratricopeptide repeats 3             | 46.08 | 1.247 | 0.0411 | 0.13 |
| 76522_at  | 76522  | Lsm8          | LSM8 homolog, U6 small nuclear RNA associated ( <i>S. cerevisiae</i> )  | 259.4 | 1.185 | 0.0412 | 0.11 |
| 20821_at  | 20821  | Trim21        | tripartite motif-containing 21                                          | 247.5 | 1.209 | 0.0415 | 0.12 |
| 73656_at  | 73656  | Ms4a6c        | membrane-spanning 4-domains, subfamily A, member 6C                     | 426.4 | 1.147 | 0.0417 | 0.09 |
| 404285_at | 404285 | V1rd11        | vomer nasal 1 receptor, D11                                             | 21.53 | 1.249 | 0.042  | 0.13 |
| 17126_at  | 17126  | Smad2         | MAD homolog 2 ( <i>Drosophila</i> )                                     | 484   | 1.165 | 0.0423 | 0.1  |
| 80287_at  | 80287  | Apobec3       | apolipoprotein B mRNA editing enzyme, catalytic polypeptide 3           | 100.9 | 1.183 | 0.0424 | 0.09 |
| 320713_at | 320713 | Mysm1         | myb-like, SWIRM and MPN domains 1                                       | 384.8 | 1.138 | 0.0424 | 0.08 |
| 51813_at  | 51813  | Ccnc          | cyclin C                                                                | 373.3 | 1.154 | 0.0426 | 0.09 |
| 26874_at  | 26874  | Abcd2         | ATP-binding cassette, sub-family D (ALD), member 2                      | 345.3 | 1.199 | 0.0429 | 0.12 |

|              |        |               |                                                                                               |       |       |        |      |
|--------------|--------|---------------|-----------------------------------------------------------------------------------------------|-------|-------|--------|------|
| 239337_at    | 239337 | Adamts12      | a disintegrin-like and metallopeptidase (repolysin type) with thrombospondin type 1 motif, 12 | 189.6 | 1.182 | 0.043  | 0.1  |
| 237504_at    | 237504 | Rassf9        | Ras association (RalGDS/AF-6) domain family (N-terminal) member 9                             | 309.7 | 1.408 | 0.043  | 0.22 |
| 12768_at     | 12768  | Ccr1          | chemokine (C-C motif) receptor 1                                                              | 17.51 | 1.217 | 0.0435 | 0.12 |
| 20910_at     | 20910  | Stxbp1        | syntaxin binding protein 1                                                                    | 329.3 | 1.128 | 0.0437 | 0.08 |
| 26388_at     | 26388  | Ifi202b       | interferon activated gene 202B                                                                | 60.75 | 1.277 | 0.0437 | 0.15 |
| 240327_at    | 240327 | Gm4951        | predicted gene 4951                                                                           | 120   | 1.413 | 0.0438 | 0.22 |
| 68852_at     | 68852  | Lrrn4cl       | LRRN4 C-terminal like                                                                         | 130.2 | 1.191 | 0.0438 | 0.1  |
| 68197_at     | 68197  | Ndufc2        | NADH dehydrogenase (ubiquinone) 1, subcomplex unknown, 2                                      | 3348  | 1.167 | 0.044  | 0.11 |
| 11745_at     | 11745  | Anxa3         | annexin A3                                                                                    | 605.9 | 1.148 | 0.0441 | 0.09 |
| 22755_at     | 22755  | Zfp93         | zinc finger protein 93                                                                        | 199   | 1.136 | 0.0441 | 0.08 |
| 404324_at    | 404324 | Olf1051       | olfactory receptor 1051                                                                       | 9.775 | 1.155 | 0.0441 | 0.09 |
| 57438_at     | 57438  |               | 7-Mar<br>membrane-associated ring finger (C3HC4) 7                                            | 676.9 | 1.122 | 0.0444 | 0.08 |
| 13008_at     | 13008  | Csrp2         | cysteine and glycine-rich protein 2                                                           | 410   | 1.183 | 0.0446 | 0.11 |
| 74117_at     | 74117  | Actr3         | ARP3 actin-related protein 3 homolog (yeast)                                                  | 2799  | 1.114 | 0.0448 | 0.08 |
| 100042485_at | 1E+08  | Gm3867        | predicted gene 3867                                                                           | 9.442 | 1.148 | 0.0448 | 0.09 |
| 258921_at    | 258921 | Olf1188       | olfactory receptor 1188                                                                       | 18.62 | 1.213 | 0.045  | 0.12 |
| 66979_at     | 66979  | Pole4         | polymerase (DNA-directed), epsilon 4 (p12 subunit)                                            | 486   | 1.123 | 0.045  | 0.08 |
| 52570_at     | 52570  | Ccdc69        | coiled-coil domain containing 69                                                              | 172.5 | 1.223 | 0.0452 | 0.13 |
| 67011_at     | 67011  | Mettl6        | methyltransferase like 6                                                                      | 532.1 | 1.133 | 0.0452 | 0.08 |
| 225358_at    | 225358 | Fam13b        | family with sequence similarity 13, member B                                                  | 408.5 | 1.143 | 0.0454 | 0.09 |
| 26930_at     | 26930  | Ppnr          | per-pentamer repeat gene                                                                      | 80.28 | 1.245 | 0.0458 | 0.13 |
| 70984_at     | 70984  | 4931406C07Rik | RIKEN cDNA 4931406C07 gene                                                                    | 240.7 | 1.154 | 0.046  | 0.09 |
| 75731_at     | 75731  | 5133401N09Rik | RIKEN cDNA 5133401N09 gene                                                                    | 648.7 | 1.156 | 0.0462 | 0.1  |
| 12368_at     | 12368  | Casp6         | caspase 6                                                                                     | 271.1 | 1.163 | 0.0463 | 0.1  |
| 637800_at    | 637800 | Gm7222        | predicted gene 7222                                                                           | 24.58 | 1.278 | 0.0464 | 0.15 |
| 76959_at     | 76959  | Chmp5         | chromatin modifying protein 5                                                                 | 1193  | 1.113 | 0.0469 | 0.08 |
| 257912_at    | 257912 | Olf948        | olfactory receptor 948                                                                        | 9.812 | 1.137 | 0.0469 | 0.08 |
| 12506_at     | 12506  | Cd48          | CD48 antigen                                                                                  | 52.06 | 1.279 | 0.0471 | 0.15 |
| 252875_at    | 252875 | Mios          | missing oocyte, meiosis regulator, homolog (Drosophila)                                       | 399.7 | 1.125 | 0.0471 | 0.08 |
| 22370_at     | 22370  | Vtn           | vitronectin                                                                                   | 625.5 | 1.141 | 0.0471 | 0.09 |
| 18974_at     | 18974  | Pole2         | polymerase (DNA directed), epsilon 2 (p59 subunit)                                            | 45.99 | 1.192 | 0.0472 | 0.1  |
| 170780_at    | 170780 | Cd209e        | CD209e antigen                                                                                | 36.79 | 1.165 | 0.0472 | 0.08 |
| 240614_at    | 240614 | Ranbp6        | RAN binding protein 6                                                                         | 746.7 | 1.137 | 0.0477 | 0.09 |
| 69352_at     | 69352  | Necab1        | N-terminal EF-hand calcium binding protein 1                                                  | 80.33 | 1.184 | 0.0478 | 0.09 |
| 780960_at    | 780960 | Gm10885       | predicted gene 10885                                                                          | 14.54 | 1.325 | 0.0481 | 0.18 |
| 100554_at    | 100554 | AA792892      | expressed sequence AA792892                                                                   | 37.33 | 1.374 | 0.0482 | 0.2  |
| 13382_at     | 13382  | Dld           | dihydrolipoamide dehydrogenase                                                                | 6271  | 1.088 | 0.0483 | 0.08 |
| 666704_at    | 666704 | Samd1         | sterile alpha motif domain containing 1                                                       | 114.9 | 1.216 | 0.0484 | 0.12 |
| 56726_at     | 56726  | Sh3bgrl       | SH3-binding domain glutamic acid-rich protein like                                            | 1194  | 1.17  | 0.0486 | 0.11 |
| 258648_at    | 258648 | Olf438        | olfactory receptor 438                                                                        | 18.63 | 1.205 | 0.0488 | 0.12 |
| 70349_at     | 70349  | Copb1         | coatamer protein complex, subunit beta 1                                                      | 1440  | 1.106 | 0.0488 | 0.08 |



|          |       |               |                                                                    |       |       |        |      |
|----------|-------|---------------|--------------------------------------------------------------------|-------|-------|--------|------|
| 67463_at | 67463 | 1200014M14Rik | RIKEN cDNA 1200014M14 gene                                         | 226.2 | 1.18  | 0.0489 | 0.11 |
| 67006_at | 67006 | Cisd2         | CDGSH iron sulfur domain 2                                         | 718   | 1.116 | 0.049  | 0.08 |
| 22035_at | 22035 | Tnfsf10       | tumor necrosis factor (ligand) superfamily, member 10              | 286.7 | 1.65  | 0.0493 | 0.33 |
| 68833_at | 68833 | Pdcl3         | phosducin-like 3                                                   | 633.7 | 1.133 | 0.0493 | 0.09 |
| 18570_at | 18570 | Pdcd6         | programmed cell death 6                                            | 462.5 | 1.17  | 0.0495 | 0.11 |
| 72085_at | 72085 | Osgepl1       | O-sialoglycoprotein endopeptidase-like 1                           | 1239  | 1.13  | 0.0496 | 0.09 |
| 16431_at | 16431 | Itn2a         | integral membrane protein 2A                                       | 849.9 | 1.223 | 0.0498 | 0.14 |
| 23961_at | 23961 | Oas1b         | 2'-5' oligoadenylate synthetase 1B                                 | 44.48 | 1.206 | 0.0499 | 0.11 |
| 66254_at | 66254 | Dimt1         | DIM1 dimethyladenosine transferase 1-like ( <i>S. cerevisiae</i> ) | 309.2 | 1.181 | 0.05   | 0.11 |

**Table S2. Downregulated genes in miR-494 hearts (393, p<0.05)**

| Probe     | Gene   | Symbol      | Name                                                   | Intensity | Fold    | p.value | std.err |
|-----------|--------|-------------|--------------------------------------------------------|-----------|---------|---------|---------|
| 209351_at | 209351 | Wfdc6a      | WAP four-disulfide core domain 6A                      | 33.4853   | -1.4843 | 0.00033 | 0.09259 |
| 668131_at | 668131 | Gm8991      | predicted gene 8991                                    | 15.6834   | -1.5709 | 0.00045 | 0.12419 |
| 626347_at | 626347 | Igk-V21-4   | immunoglobulin kappa chain variable 21 (V21)-4         | 21.6778   | -1.3942 | 0.00081 | 0.0924  |
| 269919_at | 269919 | Gm660       | predicted gene 660                                     | 27.1176   | -1.9831 | 0.00118 | 0.21913 |
| 21817_at  | 21817  | Tgm2        | transglutaminase 2, C polypeptide                      | 1990.29   | -1.3281 | 0.00131 | 0.10258 |
| 67160_at  | 67160  | Eef1g       | eukaryotic translation elongation factor 1 gamma       | 112.567   | -1.4723 | 0.00155 | 0.12281 |
| 545792_at | 545792 | Gm5871      | predicted gene 5871                                    | 50.4872   | -1.4579 | 0.00179 | 0.1169  |
| 194231_at | 194231 | Cnksr1      | connector enhancer of kinase suppressor of Ras 1       | 185.152   | -1.4837 | 0.00194 | 0.13625 |
| 22339_at  | 22339  | Vegfa       | vascular endothelial growth factor A                   | 2664.39   | -1.248  | 0.00198 | 0.08968 |
| 258086_at | 258086 | Olfir967    | olfactory receptor 967                                 | 19.1675   | -1.3956 | 0.00199 | 0.11058 |
| 17347_at  | 17347  | Mknk2       | MAP kinase-interacting serine/threonine kinase 2       | 939.791   | -1.3002 | 0.00206 | 0.09918 |
| 140781_at | 140781 | Myh7        | myosin, heavy polypeptide 7, cardiac muscle, beta      | 2108.82   | -1.5856 | 0.00222 | 0.17166 |
| 435528_at | 435528 | Gm5683      | predicted gene 5683                                    | 23.9417   | -1.4263 | 0.00225 | 0.11908 |
| 14645_at  | 14645  | Glul        | glutamate-ammonia ligase (glutamine synthetase)        | 1355.7    | -1.2433 | 0.00259 | 0.08827 |
| 27279_at  | 27279  | Tnfrsf12a   | tumor necrosis factor receptor superfamily, member 12a | 796.032   | -1.2376 | 0.00314 | 0.08669 |
| 84506_at  | 84506  | Hamp        | hepcidin antimicrobial peptide                         | 13.8806   | -1.2601 | 0.00344 | 0.08322 |
| 328778_at | 328778 | Rab26       | RAB26, member RAS oncogene family                      | 85.2138   | -1.3712 | 0.00348 | 0.10841 |
| 51897_at  | 51897  | D2Erttd391e | DNA segment, Chr 2, ERATO Doi 391, expressed           | 1275.66   | -1.2728 | 0.0039  | 0.1019  |
| 70948_at  | 70948  | Wdr20b      | WD repeat domain 20b                                   | 29.0969   | -1.3429 | 0.00406 | 0.10456 |
| 69810_at  | 69810  | Clec4b1     | C-type lectin domain family 4, member b1               | 11.2659   | -1.2768 | 0.00427 | 0.09476 |
| 15370_at  | 15370  | Nr4a1       | nuclear receptor subfamily 4, group A, member 1        | 979.887   | -1.8545 | 0.00507 | 0.25816 |
| 13138_at  | 13138  | Dag1        | dystroglycan 1                                         | 1889.41   | -1.2523 | 0.00512 | 0.1011  |
| 59069_at  | 59069  | Tpm3        | tropomyosin 3, gamma                                   | 250.969   | -1.2747 | 0.0055  | 0.09948 |
| 328825_at | 328825 | Gm5093      | predicted gene 5093                                    | 32.1539   | -1.8172 | 0.00555 | 0.24518 |
| 245566_at | 245566 | Cypt2       | cysteine-rich perinuclear theca 2                      | 31.2554   | -1.4299 | 0.0056  | 0.14019 |
| 69583_at  | 69583  | Tnfsf13     | tumor necrosis factor (ligand) superfamily, member 13  | 24.968    | -1.325  | 0.00568 | 0.10781 |
| 17691_at  | 17691  | Sik1        | salt inducible kinase 1                                | 1010.52   | -1.3964 | 0.00588 | 0.14574 |

|              |        |               |                                                                     |         |         |         |         |
|--------------|--------|---------------|---------------------------------------------------------------------|---------|---------|---------|---------|
| 71088_at     | 71088  | 4933412E24Rik | RIKEN cDNA 4933412E24 gene                                          | 71.6216 | -1.2702 | 0.00622 | 0.08286 |
| 100042456_at | NA     | NA            | NA                                                                  | 52.0371 | -1.2667 | 0.00622 | 0.08067 |
| 545152_at    | 545152 | Gm5809        | predicted gene 5809                                                 | 105.42  | -1.5162 | 0.00652 | 0.17259 |
| 668771_at    | 668771 | Gm9347        | predicted gene 9347                                                 | 391.212 | -1.3636 | 0.00681 | 0.13562 |
| 383490_at    | 383490 | Gm16393       | predicted gene 16393                                                | 35.3473 | -1.3845 | 0.00711 | 0.13092 |
| 18997_at     | 18997  | Pou4f2        | POU domain, class 4, transcription factor 2                         | 114.712 | -1.2646 | 0.00712 | 0.0908  |
| 14537_at     | 14537  | Gcnt1         | glucosaminyl (N-acetyl) transferase 1, core 2                       | 572.586 | -1.261  | 0.00715 | 0.10464 |
| 57837_at     | 57837  | Eral1         | Era (G-protein)-like 1 (E. coli)                                    | 557.026 | -1.1789 | 0.00737 | 0.07611 |
| 11910_at     | 11910  | Atf3          | activating transcription factor 3                                   | 322.256 | -1.4498 | 0.00744 | 0.1642  |
| 60425_at     | 60425  | Doc2g         | double C2, gamma                                                    | 1529.96 | -1.2099 | 0.0075  | 0.09218 |
| 18175_at     | 18175  | Nrap          | nebulin-related anchoring protein                                   | 5023.19 | -1.148  | 0.00775 | 0.07988 |
| 667731_at    | 667731 | Gm12215       | ribosomal protein S2 pseudogene                                     | 52.0591 | -1.3934 | 0.00776 | 0.13486 |
| 94244_at     | 94244  | Fkbp6         | FK506 binding protein 6                                             | 60.4913 | -1.2957 | 0.00793 | 0.09832 |
| 68867_at     | 68867  | Rnf122        | ring finger protein 122                                             | 317.513 | -1.3317 | 0.0081  | 0.12822 |
| 14177_at     | 14177  | Fgf6          | fibroblast growth factor 6                                          | 75.5568 | -1.2622 | 0.00814 | 0.08612 |
| 66277_at     | 66277  | Klf15         | Kruppel-like factor 15                                              | 623.763 | -1.3096 | 0.00827 | 0.12451 |
| 628098_at    | 628098 | Gm6839        | predicted gene 6839                                                 | 46.0174 | -1.2483 | 0.00827 | 0.0797  |
| 15939_at     | 15939  | Ier5          | immediate early response 5                                          | 424.202 | -1.3655 | 0.00837 | 0.14176 |
| 194655_at    | 194655 | Klf11         | Kruppel-like factor 11                                              | 361.774 | -1.2553 | 0.00838 | 0.10287 |
| 78321_at     | 78321  | Ankrd23       | ankyrin repeat domain 23                                            | 5702.13 | -1.1734 | 0.00866 | 0.08958 |
| 68760_at     | 68760  | Synpo2l       | synaptopodin 2-like                                                 | 1133.05 | -1.2437 | 0.00871 | 0.10519 |
| 12846_at     | 12846  | Comt1         | catechol-O-methyltransferase 1                                      | 2271.74 | -1.2364 | 0.00889 | 0.1054  |
| 237560_at    | 237560 | Lrrc10        | leucine rich repeat containing 10                                   | 1046.25 | -1.2927 | 0.00896 | 0.12238 |
| 384783_at    | 384783 | Irs2          | insulin receptor substrate 2                                        | 226.612 | -1.5014 | 0.009   | 0.18491 |
| 668668_at    | 668668 | Gm9294        | predicted gene 9294                                                 | 586.831 | -1.256  | 0.00941 | 0.10812 |
| 13508_at     | 13508  | Dscam         | Down syndrome cell adhesion molecule                                | 47.456  | -1.2735 | 0.00942 | 0.09387 |
| 435962_at    | 435962 | Gm5731        | predicted gene 5731                                                 | 87.4497 | -1.2774 | 0.00965 | 0.09846 |
| 13392_at     | 13392  | Dlx2          | distal-less homeobox 2                                              | 77.8666 | -1.2821 | 0.00971 | 0.09927 |
| 636952_at    | 636952 | Gm7194        | predicted gene 7194                                                 | 21.4444 | -1.2741 | 0.00982 | 0.10317 |
| 70652_at     | 70652  | Tmem144       | transmembrane protein 144                                           | 1599.4  | -1.2588 | 0.00986 | 0.11372 |
| 100041924_at | 1E+08  | Gm3576        | predicted gene 3576                                                 | 17.3029 | -1.4174 | 0.00997 | 0.15826 |
| 243642_at    | 243642 | Gm4968        | predicted gene 4968                                                 | 697.663 | -1.2786 | 0.00998 | 0.11825 |
| 20411_at     | 20411  | Sorbs1        | sorbin and SH3 domain containing 1                                  | 2573.45 | -1.1981 | 0.01004 | 0.09468 |
| 83557_at     | 83557  | Lin28         | lin-28 homolog (C. elegans)                                         | 126.571 | -1.2598 | 0.01008 | 0.09831 |
| 57436_at     | 57436  | Gabarapl1     | gamma-aminobutyric acid (GABA) A receptor-associated protein-like 1 | 1217.08 | -1.1787 | 0.01008 | 0.08455 |
| 227638_at    | 227638 | Qsox2         | quiescin Q6 sulfhydryl oxidase 2                                    | 269.202 | -1.2293 | 0.01047 | 0.09535 |
| 232887_at    | 232887 | Gm4879        | WD repeat domain 12 pseudogene                                      | 138.128 | -1.3919 | 0.0105  | 0.15056 |
| 223513_at    | 223513 | Abra          | actin-binding Rho activating protein                                | 1124.31 | -1.2379 | 0.01052 | 0.10649 |
| 74840_at     | 74840  | Manf          | mesencephalic astrocyte-derived neurotrophic factor                 | 630.194 | -1.2133 | 0.01059 | 0.09496 |
| 13838_at     | 13838  | Epha4         | Eph receptor A4                                                     | 777.342 | -1.3655 | 0.01089 | 0.15112 |
| 208449_at    | 208449 | Sgms1         | sphingomyelin synthase 1                                            | 1052.95 | -1.2993 | 0.01093 | 0.12907 |
| 272381_at    | 272381 | Lrrc4b        | leucine rich repeat containing 4B                                   | 407.187 | -1.205  | 0.011   | 0.08957 |
| 104175_at    | 104175 | Sbk1          | SH3-binding kinase 1                                                | 610.623 | -1.2137 | 0.01105 | 0.09563 |
| 268807_at    | 268807 | Klhl38        | kelch-like 38 (Drosophila)                                          | 652.024 | -1.2726 | 0.0112  | 0.11826 |

|              |        |               |                                                                                                |         |         |         |         |
|--------------|--------|---------------|------------------------------------------------------------------------------------------------|---------|---------|---------|---------|
| 64209_at     | 64209  | Herpud1       | homocysteine-inducible, endoplasmic reticulum stress-inducible, ubiquitin-like domain member 1 | 3400.96 | -1.2306 | 0.01125 | 0.1096  |
| 12125_at     | 12125  | Bcl2l11       | BCL2-like 11 (apoptosis facilitator)                                                           | 213.021 | -1.272  | 0.01136 | 0.11216 |
| 17965_at     | 17965  | Nbl1          | neuroblastoma, suppression of tumorigenicity 1                                                 | 188.438 | -1.1967 | 0.01156 | 0.08057 |
| 432681_at    | 432681 | Gm5437        | ribosomal protein L31 pseudogene                                                               | 15.0635 | -1.5637 | 0.0117  | 0.21274 |
| 320292_at    | 320292 | Rasgef1b      | RasGEF domain family, member 1B                                                                | 144.817 | -1.5169 | 0.01181 | 0.19742 |
| 21898_at     | 21898  | Tlr4          | toll-like receptor 4                                                                           | 776.673 | -1.1864 | 0.01196 | 0.08778 |
| 17748_at     | 17748  | Mt1           | metallothionein 1                                                                              | 3471.53 | -1.2168 | 0.01198 | 0.10588 |
| 215748_at    | 215748 | Cnksr3        | Cnksr family member 3                                                                          | 639.03  | -1.2842 | 0.01201 | 0.12402 |
| 68794_at     | 68794  | Flnc          | filamin C, gamma                                                                               | 1753.14 | -1.2125 | 0.01203 | 0.10086 |
| 67379_at     | 67379  | Dedd2         | death effector domain-containing DNA binding protein 2                                         | 321.914 | -1.2135 | 0.01209 | 0.093   |
| 100043368_at | 1E+08  | Gm10361       | predicted gene 10361                                                                           | 15.9646 | -1.3271 | 0.01214 | 0.13226 |
| 258405_at    | 258405 | Olf1420       | olfactory receptor 1420                                                                        | 45.6696 | -1.3279 | 0.01219 | 0.12389 |
| 213989_at    | 213989 | Tmem82        | transmembrane protein 82                                                                       | 258.92  | -1.5267 | 0.01221 | 0.20481 |
| 17750_at     | 17750  | Mt2           | metallothionein 2                                                                              | 1012.06 | -1.389  | 0.01229 | 0.16345 |
| 545812_at    | 545812 | Pilrb2        | paired immunoglobulin-like type 2 receptor beta 2                                              | 24.9546 | -1.2645 | 0.0123  | 0.10271 |
| 140742_at    | 140742 | Sesn1         | sestrin 1                                                                                      | 2528.39 | -1.1968 | 0.01233 | 0.09718 |
| 433022_at    | 433022 | Plcxd2        | phosphatidylinositol-specific phospholipase C, X domain containing 2                           | 59.7781 | -1.2237 | 0.01262 | 0.07707 |
| 76585_at     | 76585  | Lce1i         | late cornified envelope 1l                                                                     | 21.894  | -1.328  | 0.01299 | 0.13166 |
| 69314_at     | 69314  | 1700011H22Rik | RIKEN cDNA 1700011H22 gene                                                                     | 13.6865 | -1.21   | 0.01314 | 0.08804 |
| 279618_at    | 279618 | Gm715         | predicted gene 715                                                                             | 137.683 | -1.2023 | 0.01316 | 0.08055 |
| 100039265_at | 1E+08  | LOC100039265  | hypothetical protein LOC100039265                                                              | 79.1954 | -1.4631 | 0.01328 | 0.17879 |
| 664817_at    | 664817 | Gm7353        | zinc finger CCCH type containing 3 pseudogene                                                  | 22.0705 | -1.3335 | 0.0137  | 0.13534 |
| 56219_at     | 56219  | Extl1         | exostoses (multiple)-like 1                                                                    | 345.232 | -1.1997 | 0.01385 | 0.09028 |
| 74284_at     | 74284  | 1700086L19Rik | RIKEN cDNA 1700086L19 gene                                                                     | 30.7375 | -1.223  | 0.01387 | 0.08389 |
| 381591_at    | 381591 | L1td1         | LINE-1 type transposase domain containing 1                                                    | 42.4153 | -1.2539 | 0.01417 | 0.0961  |
| 12235_at     | 12235  | Bub1          | budding uninhibited by benzimidazoles 1 homolog (S. cerevisiae)                                | 35.4981 | -1.3013 | 0.0142  | 0.11865 |
| 68943_at     | 68943  | Pink1         | PTEN induced putative kinase 1                                                                 | 3307.62 | -1.2183 | 0.01451 | 0.10947 |
| 26912_at     | 26912  | Gcat          | glycine C-acetyltransferase (2-amino-3-ketobutyrate-coenzyme A ligase)                         | 148.155 | -1.2025 | 0.0147  | 0.08425 |
| 23927_at     | 23927  | Krtap14       | keratin associated protein 14                                                                  | 35.4588 | -1.2475 | 0.01502 | 0.09603 |
| 319188_at    | 319188 | Hist1h2bp     | histone cluster 1, H2bp                                                                        | 265.224 | -1.194  | 0.01539 | 0.08791 |
| 29818_at     | 29818  | Hspb7         | heat shock protein family, member 7 (cardiovascular)                                           | 3435.49 | -1.1696 | 0.01543 | 0.09233 |
| 14120_at     | 14120  | Fbp2          | fructose biphosphatase 2                                                                       | 369.53  | -1.1839 | 0.01543 | 0.08604 |
| 15277_at     | 15277  | Hk2           | hexokinase 2                                                                                   | 3461.03 | -1.1864 | 0.01552 | 0.09881 |
| 104183_at    | 104183 | Chi3l4        | chitinase 3-like 4                                                                             | 12.1286 | -1.2039 | 0.01579 | 0.09046 |
| 16156_at     | 16156  | Il11          | interleukin 11                                                                                 | 50.2977 | -1.2349 | 0.01583 | 0.08901 |
| 21859_at     | 21859  | Timp3         | tissue inhibitor of metalloproteinase 3                                                        | 973.94  | -1.1773 | 0.01593 | 0.08975 |
| 194225_at    | 194225 | Gm13103       | predicted gene 13103                                                                           | 42.462  | -1.3514 | 0.01599 | 0.14248 |
| 57435_at     | 57435  | Plin4         | perilipin 4                                                                                    | 583.121 | -1.2103 | 0.01622 | 0.10105 |
| 56018_at     | 56018  | Stard10       | START domain containing 10                                                                     | 514.876 | -1.2301 | 0.01633 | 0.10864 |
| 16007_at     | 16007  | Cyr61         | cysteine rich protein 61                                                                       | 1395.48 | -1.1789 | 0.01634 | 0.09215 |

|           |        |               |                                                                                                         |         |         |         |         |
|-----------|--------|---------------|---------------------------------------------------------------------------------------------------------|---------|---------|---------|---------|
| 14776_at  | 14776  | Gpx2          | glutathione peroxidase 2                                                                                | 33.9369 | -1.3543 | 0.01641 | 0.14581 |
| 18787_at  | 18787  | Serpine1      | serine (or cysteine) peptidase inhibitor, clade E, member 1                                             | 560.575 | -1.2553 | 0.01651 | 0.11965 |
| 239017_at | 239017 | Ogdhl         | oxoglutarate dehydrogenase-like                                                                         | 1094.99 | -1.2123 | 0.01677 | 0.10537 |
| 71720_at  | 71720  | Osbpl3        | oxysterol binding protein-like 3                                                                        | 1008.32 | -1.2011 | 0.01736 | 0.10114 |
| 56722_at  | 56722  | Litaf         | LPS-induced TN factor                                                                                   | 652.614 | -1.1893 | 0.01748 | 0.09434 |
| 18984_at  | 18984  | Por           | P450 (cytochrome) oxidoreductase                                                                        | 584.72  | -1.1865 | 0.01753 | 0.09253 |
| 223726_at | 223726 | Mpped1        | metallophosphoesterase domain containing 1                                                              | 108.822 | -1.2065 | 0.01765 | 0.08411 |
| 20510_at  | 20510  | Slc1a1        | solute carrier family 1 (neuronal/epithelial high affinity glutamate transporter, system Xag), member 1 | 130.67  | -1.25   | 0.01789 | 0.10861 |
| 12020_at  | 12020  | Nkx3-2        | NK3 homeobox 2                                                                                          | 88.7163 | -1.3032 | 0.01789 | 0.12706 |
| 208634_at | 208634 | Tspan10       | tetraspanin 10                                                                                          | 91.5816 | -1.3007 | 0.01795 | 0.12636 |
| 272428_at | 272428 | Acsm5         | acyl-CoA synthetase medium-chain family member 5                                                        | 103.82  | -1.2827 | 0.01806 | 0.1201  |
| 67760_at  | 67760  | Slc38a2       | solute carrier family 38, member 2                                                                      | 5427.29 | -1.1544 | 0.01817 | 0.09162 |
| 338350_at | 338350 | 9330129D05Rik | RIKEN cDNA 9330129D05 gene                                                                              | 775.49  | -1.251  | 0.01821 | 0.12171 |
| 97187_at  | 97187  | C87977        | expressed sequence C87977                                                                               | 46.2402 | -1.2974 | 0.01835 | 0.12343 |
| 59001_at  | 59001  | Pole3         | polymerase (DNA directed), epsilon 3 (p17 subunit)                                                      | 205.802 | -1.1865 | 0.01837 | 0.0858  |
| 16615_at  | 16615  | Klk1b16       | kallikrein 1-related peptidase b16                                                                      | 12.6282 | -1.254  | 0.01853 | 0.1159  |
| 252906_at | 252906 | V1rh2         | vomeronasal 1 receptor, H2                                                                              | 14.6005 | -1.2556 | 0.01869 | 0.11547 |
| 116913_at | 116913 | Tpppb         | trophoblast specific protein beta                                                                       | 10.5903 | -1.1944 | 0.01872 | 0.09114 |
| 18550_at  | 18550  | Furin         | furin (paired basic amino acid cleaving enzyme)                                                         | 498.863 | -1.2508 | 0.01874 | 0.12028 |
| 225638_at | 225638 | Alpk2         | alpha-kinase 2                                                                                          | 1514.04 | -1.2126 | 0.01881 | 0.10872 |
| 434246_at | 434246 | Trim72        | tripartite motif-containing 72                                                                          | 2637.2  | -1.2202 | 0.019   | 0.11421 |
| 16917_at  | 16917  | Lmx1b         | LIM homeobox transcription factor 1 beta                                                                | 220.307 | -1.2377 | 0.01902 | 0.11044 |
| 407789_at | 407789 | BC048644      | cDNA sequence BC048644                                                                                  | 25.3664 | -1.2519 | 0.01903 | 0.10838 |
| 320159_at | 320159 | Fam179a       | family with sequence similarity 179, member A                                                           | 130.878 | -1.3433 | 0.01906 | 0.1509  |
| 268420_at | 268420 | Alkbh5        | alkB, alkylation repair homolog 5 (E. coli)                                                             | 1676.77 | -1.1657 | 0.01921 | 0.08997 |
| 52331_at  | 52331  | Stbd1         | starch binding domain 1                                                                                 | 46.9219 | -1.2303 | 0.01925 | 0.09233 |
| 13845_at  | 13845  | Ephb3         | Eph receptor B3                                                                                         | 223.735 | -1.2615 | 0.01938 | 0.12147 |
| 432836_at | 432836 | 3425401B19Rik | RIKEN cDNA 3425401B19 gene                                                                              | 544.971 | -1.2599 | 0.01948 | 0.12551 |
| 27419_at  | 27419  | Naglu         | alpha-N-acetylglucosaminidase (Sanfilippo disease IIIB)                                                 | 217.301 | -1.17   | 0.01954 | 0.07967 |
| 11354_at  | 11354  | Abpa          | androgen binding protein alpha                                                                          | 73.1696 | -1.2218 | 0.01956 | 0.08869 |
| 208522_at | 208522 | Gm4754        | predicted gene 4754                                                                                     | 37.0456 | -1.4854 | 0.01959 | 0.20382 |
| 75628_at  | 75628  | 1700010L13Rik | RIKEN cDNA 1700010L13 gene                                                                              | 145.239 | -1.1881 | 0.01983 | 0.08331 |
| 382639_at | 382639 | Gm5188        | predicted gene 5188                                                                                     | 144.052 | -1.216  | 0.02005 | 0.09714 |
| 18124_at  | 18124  | Nr4a3         | nuclear receptor subfamily 4, group A, member 3                                                         | 144.962 | -1.6207 | 0.0201  | 0.25705 |
| 76737_at  | 76737  | Creld2        | cysteine-rich with EGF-like domains 2                                                                   | 451.465 | -1.1553 | 0.02054 | 0.07963 |
| 22433_at  | 22433  | Xbp1          | X-box binding protein 1                                                                                 | 1242.55 | -1.1718 | 0.02071 | 0.09278 |
| 16477_at  | 16477  | Junb          | Jun-B oncogene                                                                                          | 118.3   | -1.1822 | 0.02078 | 0.07706 |
| 76454_at  | 76454  | Fbxo31        | F-box protein 31                                                                                        | 1271.31 | -1.3073 | 0.02091 | 0.1498  |
| 546913_at | 546913 | Vmn2r22       | vomeronasal 2, receptor 22                                                                              | 24.9987 | -1.6225 | 0.02091 | 0.2582  |
| 16627_at  | 16627  | Klra1         | killer cell lectin-like receptor, subfamily A, member 1                                                 | 12.0757 | -1.3003 | 0.02094 | 0.13978 |

|              |        |               |                                                                      |         |         |         |         |
|--------------|--------|---------------|----------------------------------------------------------------------|---------|---------|---------|---------|
| 244199_at    | 244199 | Ovch2         | ovochoymase 2                                                        | 31.7641 | -1.2278 | 0.02124 | 0.0969  |
| 12957_at     | 12957  | Cryba1        | crystallin, beta A1                                                  | 32.4919 | -1.2462 | 0.02135 | 0.10611 |
| 75475_at     | 75475  | Oplah         | 5-oxoprolinase (ATP-hydrolysing)                                     | 545.079 | -1.1638 | 0.02164 | 0.08577 |
| 22147_at     | 22147  | Tuba3b        | tubulin, alpha 3B                                                    | 17.2212 | -1.2152 | 0.02185 | 0.09909 |
| 104156_at    | 104156 | Etv5          | ets variant gene 5                                                   | 145.256 | -1.2711 | 0.02192 | 0.12538 |
| 100041819_at | 1E+08  | Gm10167       | predicted gene 10167                                                 | 59.2328 | -1.3715 | 0.02211 | 0.16238 |
| 20404_at     | 20404  | Sh3gl2        | SH3-domain GRB2-like 2                                               | 87.9742 | -1.2206 | 0.02235 | 0.09387 |
| 258700_at    | 258700 | Olf1451       | olfactory receptor 1451                                              | 15.6615 | -1.1726 | 0.02239 | 0.07943 |
| 100043538_at | 1E+08  | LOC100043538  | hypothetical protein LOC100043538                                    | 48.2128 | -1.2192 | 0.02271 | 0.091   |
| 56437_at     | 56437  | Rrad          | Ras-related associated with diabetes                                 | 1958.31 | -1.1911 | 0.02274 | 0.10435 |
| 666048_at    | 666048 | Gm12824       | predicted gene 12824                                                 | 167.546 | -1.2041 | 0.02284 | 0.09663 |
| 404336_at    | 404336 | Olf1380       | olfactory receptor 1380                                              | 69.6747 | -1.3625 | 0.02295 | 0.16032 |
| 11606_at     | 11606  | Agt           | angiotensinogen (serpin peptidase inhibitor, clade A, member 8)      | 147.005 | -1.3265 | 0.02307 | 0.15172 |
| 627734_at    | 627734 | Gm6783        | predicted gene 6783                                                  | 28.5363 | -1.2657 | 0.02317 | 0.11945 |
| 269109_at    | 269109 | Dpp10         | dipeptidylpeptidase 10                                               | 14.558  | -1.1842 | 0.02323 | 0.08713 |
| 225058_at    | 225058 | Gm4832        | predicted gene 4832                                                  | 184.987 | -1.1946 | 0.02331 | 0.09367 |
| 26457_at     | 26457  | Slc27a1       | solute carrier family 27 (fatty acid transporter), member 1          | 1958.47 | -1.1683 | 0.02334 | 0.09493 |
| 12399_at     | 12399  | Runx3         | runt related transcription factor 3                                  | 104.003 | -1.2003 | 0.02351 | 0.08712 |
| 171183_at    | 171183 | V1rc10        | vomeronal 1 receptor, C10                                            | 8.47245 | -1.1622 | 0.02375 | 0.08306 |
| 11859_at     | 11859  | Phox2a        | paired-like homeobox 2a                                              | 65.3583 | -1.2292 | 0.02389 | 0.09766 |
| 19416_at     | 19416  | Rasd1         | RAS, dexamethasone-induced 1                                         | 229.901 | -1.27   | 0.02397 | 0.13146 |
| 268860_at    | 268860 | Abat          | 4-aminobutyrate aminotransferase                                     | 359.444 | -1.3153 | 0.02403 | 0.15342 |
| 208144_at    | 208144 | Dhx37         | DEAH (Asp-Glu-Ala-His) box polypeptide 37                            | 429.006 | -1.1727 | 0.02414 | 0.09032 |
| 16601_at     | 16601  | Klf9          | Kruppel-like factor 9                                                | 1415.64 | -1.1963 | 0.02429 | 0.10686 |
| 230815_at    | 230815 | Man1c1        | mannosidase, alpha, class 1C, member 1                               | 594.62  | -1.1747 | 0.02436 | 0.09353 |
| 236285_at    | 236285 | Lancl3        | LanC lantibiotic synthetase component C-like 3 (bacterial)           | 129.968 | -1.2667 | 0.02446 | 0.12534 |
| 414094_at    | 414094 | A930013B10Rik | RIKEN cDNA A930013B10 gene                                           | 90.566  | -1.2207 | 0.02465 | 0.09713 |
| 93721_at     | 93721  | Cpn1          | carboxypeptidase N, polypeptide 1                                    | 38.8527 | -1.2178 | 0.02484 | 0.09407 |
| 665612_at    | 665612 | Gm7712        | predicted gene 7712                                                  | 89.6152 | -1.1962 | 0.02485 | 0.08369 |
| 17928_at     | 17928  | Myog          | myogenin                                                             | 60.1799 | -1.2243 | 0.02493 | 0.09605 |
| 211468_at    | 211468 | Kcnh8         | potassium voltage-gated channel, subfamily H (eag-related), member 8 | 38.9275 | -1.2652 | 0.02506 | 0.11908 |
| 269615_at    | 269615 | Plch2         | phospholipase C, eta 2                                               | 82.3573 | -1.2915 | 0.02508 | 0.13234 |
| 17870_at     | 17870  | Mycs          | myc-like oncogene, s-myc protein                                     | 83.7053 | -1.2376 | 0.02544 | 0.10603 |
| 21756_at     | 21756  | Tesp2         | testicular serine protease 2                                         | 33.0107 | -1.2138 | 0.0255  | 0.09424 |
| 338348_at    | 338348 | Ttc16         | tetratricopeptide repeat domain 16                                   | 115.857 | -1.2168 | 0.02557 | 0.10018 |
| 18361_at     | 18361  | Olf160        | olfactory receptor 60                                                | 19.274  | -1.1827 | 0.02568 | 0.085   |
| 210274_at    | 210274 | Shank2        | SH3/ankyrin domain gene 2                                            | 86.3023 | -1.2544 | 0.02616 | 0.11593 |
| 114666_at    | 114666 | Krtap5-5      | keratin associated protein 5-5                                       | 29.0818 | -1.2152 | 0.02626 | 0.09743 |
| 229499_at    | 229499 | Fcrl1         | Fc receptor-like 1                                                   | 33.3226 | -1.2109 | 0.02628 | 0.09344 |
| 626150_at    | 626150 | Gm12271       | predicted gene 12271                                                 | 20.2598 | -1.2464 | 0.02642 | 0.11783 |
| 258120_at    | 258120 | Olf1463       | olfactory receptor 1463                                              | 45.7625 | -1.2684 | 0.02643 | 0.12174 |
| 30951_at     | 30951  | Cbx8          | chromobox homolog 8 (Drosophila Pc class)                            | 178.206 | -1.1947 | 0.02667 | 0.09644 |
| 218215_at    | 218215 | Rnf144b       | ring finger protein 144B                                             | 687.82  | -1.3875 | 0.02686 | 0.19007 |

|              |        |               |                                                                            |         |         |         |         |
|--------------|--------|---------------|----------------------------------------------------------------------------|---------|---------|---------|---------|
| 17830_at     | 17830  | Prol1         | proline rich, lacrimal 1                                                   | 11.7046 | -1.2004 | 0.0269  | 0.10117 |
| 12311_at     | 12311  | Calcr         | calcitonin receptor                                                        | 30.7119 | -1.2069 | 0.02694 | 0.09293 |
| 83429_at     | 83429  | Ctns          | cystinosis, nephropathic                                                   | 312.946 | -1.1473 | 0.02724 | 0.07776 |
| 72043_at     | 72043  | Sulf2         | sulfatase 2                                                                | 566.03  | -1.1656 | 0.02727 | 0.09114 |
| 104885_at    | 104885 | Tmem179       | transmembrane protein 179                                                  | 146.695 | -1.2061 | 0.02763 | 0.10069 |
| 237987_at    | 237987 | Otop2         | otopetrin 2                                                                | 151.086 | -1.2508 | 0.02782 | 0.12358 |
| 330222_at    | 330222 | Sdk1          | sidekick homolog 1 (chicken)                                               | 90.8042 | -1.2218 | 0.02786 | 0.10137 |
| 216505_at    | 216505 | Pik3ip1       | phosphoinositide-3-kinase interacting protein 1                            | 610.567 | -1.1738 | 0.02788 | 0.09599 |
| 14874_at     | 14874  | Gstz1         | glutathione transferase zeta 1 (maleylacetoacetate isomerase)              | 515.89  | -1.2129 | 0.02803 | 0.11369 |
| 623519_at    | 623519 | Gm6438        | predicted gene 6438                                                        | 289.724 | -1.2159 | 0.02832 | 0.11225 |
| 19245_at     | 19245  | Ptp4a3        | protein tyrosine phosphatase 4a3                                           | 1632.96 | -1.1817 | 0.0284  | 0.10399 |
| 58805_at     | 58805  | Mlxip1        | MLX interacting protein-like                                               | 261.21  | -1.2529 | 0.02842 | 0.12944 |
| 233199_at    | 233199 | Mybpc2        | myosin binding protein C, fast-type                                        | 360.99  | -1.2542 | 0.02849 | 0.13176 |
| 14281_at     | 14281  | Fos           | FBJ osteosarcoma oncogene                                                  | 120.161 | -1.263  | 0.02852 | 0.12744 |
| 384071_at    | 384071 | Slc25a34      | solute carrier family 25, member 34                                        | 1228.84 | -1.2202 | 0.02855 | 0.12104 |
| 71820_at     | 71820  | Wdr34         | WD repeat domain 34                                                        | 320.746 | -1.1497 | 0.02877 | 0.08022 |
| 258008_at    | 258008 | Olf15l3       | olfactory receptor 1513                                                    | 18.1519 | -1.2948 | 0.029   | 0.14518 |
| 69288_at     | 69288  | Rhobtb1       | Rho-related BTB domain containing 1                                        | 1341.83 | -1.2401 | 0.02901 | 0.13074 |
| 216082_at    | 216082 | Gm4798        | ets variant gene 5 pseudogene                                              | 10.8202 | -1.2099 | 0.02947 | 0.10897 |
| 17869_at     | 17869  | Myc           | myelocytomatosis oncogene                                                  | 119.179 | -1.3375 | 0.02962 | 0.16404 |
| 414801_at    | 414801 | Itpr1         | inositol 1,4,5-triphosphate receptor interacting protein                   | 210.341 | -1.1775 | 0.02974 | 0.09196 |
| 72029_at     | 72029  | Cnpy3         | canopy 3 homolog (zebrafish)                                               | 286.124 | -1.1726 | 0.02984 | 0.09184 |
| 243373_at    | 243373 | AI854703      | expressed sequence AI854703                                                | 53.4576 | -1.2058 | 0.02985 | 0.09122 |
| 72654_at     | 72654  | Ccdc12        | coiled-coil domain containing 12                                           | 151.958 | -1.2416 | 0.0299  | 0.12137 |
| 12778_at     | 12778  | Cxcr7         | chemokine (C-X-C motif) receptor 7                                         | 299.39  | -1.1932 | 0.03018 | 0.10285 |
| 258491_at    | 258491 | Olf490        | olfactory receptor 490                                                     | 10.1538 | -1.1784 | 0.03018 | 0.09425 |
| 17930_at     | 17930  | Myom2         | myomesin 2                                                                 | 6089.03 | -1.2285 | 0.0302  | 0.13242 |
| 12590_at     | 12590  | Cdx1          | caudal type homeo box 1                                                    | 145.827 | -1.1731 | 0.03024 | 0.08522 |
| 19752_at     | 19752  | Rnase1        | ribonuclease, RNase A family, 1 (pancreatic)                               | 87.6447 | -1.2513 | 0.03037 | 0.11948 |
| 20762_at     | 20762  | Spr2h         | small proline-rich protein 2H                                              | 24.3094 | -1.298  | 0.03074 | 0.14642 |
| 93882_at     | 93882  | Pcdhb11       | protocadherin beta 11                                                      | 72.9698 | -1.251  | 0.0308  | 0.11821 |
| 12765_at     | 12765  | Il8rb         | interleukin 8 receptor, beta                                               | 17.3083 | -1.1734 | 0.03088 | 0.08583 |
| 75815_at     | 75815  | 4930470H14Rik | RIKEN cDNA 4930470H14 gene                                                 | 21.8301 | -1.1716 | 0.03091 | 0.0815  |
| 75751_at     | 75751  | Ipo4          | importin 4                                                                 | 649.239 | -1.1653 | 0.03098 | 0.09441 |
| 11551_at     | 11551  | Adra2a        | adrenergic receptor, alpha 2a                                              | 54.345  | -1.1987 | 0.03132 | 0.08841 |
| 100039724_at | 1E+08  | Gm16509       | predicted gene 16509                                                       | 15.1995 | -1.1594 | 0.03135 | 0.08012 |
| 433715_at    | 433715 | Gm11249       | predicted gene 11249                                                       | 9833.68 | -1.1182 | 0.03141 | 0.08743 |
| 16337_at     | 16337  | Insr          | insulin receptor                                                           | 1653.27 | -1.1551 | 0.03148 | 0.09367 |
| 66270_at     | 66270  | Fam134b       | family with sequence similarity 134, member B                              | 1892.58 | -1.1926 | 0.03169 | 0.11203 |
| 621127_at    | 621127 | Mup-ps14      | major urinary protein, pseudogene 14                                       | 9.01398 | -1.2335 | 0.03173 | 0.12423 |
| 69582_at     | 69582  | Plekha2       | pleckstrin homology domain containing, family M (with RUN domain) member 2 | 607.009 | -1.2566 | 0.03174 | 0.13858 |
| 20779_at     | 20779  | Src           | Rous sarcoma oncogene                                                      | 136.751 | -1.1788 | 0.03195 | 0.08869 |
| 270150_at    | 270150 | Ccdc153       | coiled-coil domain containing 153                                          | 170.078 | -1.1914 | 0.032   | 0.09882 |

|           |        |               |                                                                                                  |         |         |         |         |
|-----------|--------|---------------|--------------------------------------------------------------------------------------------------|---------|---------|---------|---------|
| 15013_at  | 15013  | H2-Q2         | histocompatibility 2, Q region locus 2                                                           | 70.7957 | -1.2417 | 0.03201 | 0.11437 |
| 545743_at | 545743 | Gm5864        | predicted gene 5864                                                                              | 1557.83 | -1.1847 | 0.03202 | 0.10789 |
| 258113_at | 258113 | Olfir748      | olfactory receptor 748                                                                           | 13.5093 | -1.227  | 0.03214 | 0.11802 |
| 57752_at  | 57752  | Tacc2         | transforming, acidic coiled-coil containing protein 2                                            | 1607.3  | -1.2054 | 0.03214 | 0.11787 |
| 233038_at | 233038 | Nccrp1        | non-specific cytotoxic cell receptor protein 1 homolog (zebrafish)                               | 104.598 | -1.2216 | 0.03233 | 0.10801 |
| 80906_at  | 80906  | Kcnp2         | Kv channel-interacting protein 2                                                                 | 2335.22 | -1.1623 | 0.03237 | 0.09908 |
| 233977_at | 233977 | Ppfia1        | protein tyrosine phosphatase, receptor type, f polypeptide (PTPRF), interacting protein, alpha 1 | 661.955 | -1.2273 | 0.03259 | 0.12586 |
| 21678_at  | 21678  | Tead3         | TEA domain family member 3                                                                       | 213.891 | -1.1644 | 0.03264 | 0.08733 |
| 319187_at | 319187 | Hist1h2bn     | histone cluster 1, H2bn                                                                          | 140.151 | -1.2366 | 0.03322 | 0.12125 |
| 327799_at | 327799 | Usp44         | ubiquitin specific peptidase 44                                                                  | 32.4472 | -1.208  | 0.03322 | 0.09916 |
| 98878_at  | 98878  | Ehd4          | EH-domain containing 4                                                                           | 4994.79 | -1.1291 | 0.03336 | 0.08922 |
| 11549_at  | 11549  | Adra1a        | adrenergic receptor, alpha 1a                                                                    | 463.033 | -1.3532 | 0.03344 | 0.18365 |
| 434339_at | 434339 | Gm5610        | adaptor-related protein complex 3, sigma 1 subunit pseudogene                                    | 1126.95 | -1.1486 | 0.03361 | 0.09045 |
| 628900_at | 628900 | Gm6930        | predicted gene 6930                                                                              | 76.2541 | -1.4431 | 0.03372 | 0.21404 |
| 56323_at  | 56323  | Dnajb5        | DnaJ (Hsp40) homolog, subfamily B, member 5                                                      | 1252.71 | -1.1533 | 0.03373 | 0.0932  |
| 242939_at | 242939 | Cpz           | carboxypeptidase Z                                                                               | 95.684  | -1.2139 | 0.03373 | 0.10374 |
| 320593_at | 320593 | A230051N06Rik | RIKEN cDNA A230051N06 gene                                                                       | 104.854 | -1.2182 | 0.03409 | 0.10786 |
| 16706_at  | 16706  | Ksr1          | kinase suppressor of ras 1                                                                       | 146.526 | -1.1597 | 0.03418 | 0.08064 |
| 258649_at | 258649 | Olfir441      | olfactory receptor 441                                                                           | 11.9889 | -1.3198 | 0.03426 | 0.16629 |
| 18640_at  | 18640  | Pfkfb2        | 6-phosphofructo-2-kinase/fructose-2,6-biphosphatase 2                                            | 2331.51 | -1.1745 | 0.03442 | 0.10617 |
| 94045_at  | 94045  | P2rx5         | purinergic receptor P2X, ligand-gated ion channel, 5                                             | 363.141 | -1.2205 | 0.03458 | 0.12135 |
| 242022_at | 242022 | Frem2         | Fras1 related extracellular matrix protein 2                                                     | 265.974 | -1.2152 | 0.03467 | 0.11701 |
| 677858_at | 677858 | Igkv8-24      | immunoglobulin kappa chain variable 8-24                                                         | 9.37903 | -1.2065 | 0.03478 | 0.11305 |
| 320321_at | 320321 | 9430077A04Rik | RIKEN cDNA 9430077A04 gene                                                                       | 109.935 | -1.1929 | 0.03492 | 0.09504 |
| 18217_at  | 18217  | Ntsr2         | neurotensin receptor 2                                                                           | 173.535 | -1.2356 | 0.03501 | 0.12478 |
| 75695_at  | 75695  | Rilpl1        | Rab interacting lysosomal protein-like 1                                                         | 1747.77 | -1.1501 | 0.03504 | 0.0935  |
| 11451_at  | 11451  | Acrv1         | acrosomal vesicle protein 1                                                                      | 31.6888 | -1.2033 | 0.03525 | 0.09859 |
| 20289_at  | 20289  | Scx           | scleraxis                                                                                        | 252.746 | -1.2061 | 0.03532 | 0.1126  |
| 215928_at | 215928 | BC021785      | cDNA sequence BC021785                                                                           | 90.4314 | -1.2097 | 0.03534 | 0.10203 |
| 50913_at  | 50913  | Olig2         | oligodendrocyte transcription factor 2                                                           | 39.3499 | -1.2394 | 0.03541 | 0.11741 |
| 76399_at  | 76399  | Il31          | interleukin 31                                                                                   | 104.209 | -1.1793 | 0.03542 | 0.08639 |
| 216805_at | 216805 | Flcn          | folliculin                                                                                       | 1186.94 | -1.2336 | 0.03555 | 0.13336 |
| 93961_at  | 93961  | B3galt5       | UDP-Gal:betaGlcNAc beta 1,3-galactosyltransferase, polypeptide 5                                 | 25.8292 | -1.1673 | 0.03575 | 0.08009 |
| 235493_at | 235493 | BC031353      | cDNA sequence BC031353                                                                           | 688.444 | -1.1456 | 0.03601 | 0.08788 |
| 16559_at  | 16559  | Kif17         | kinesin family member 17                                                                         | 70.7258 | -1.2091 | 0.03605 | 0.09982 |
| 15551_at  | 15551  | Htr1b         | 5-hydroxytryptamine (serotonin) receptor 1B                                                      | 49.383  | -1.1724 | 0.03607 | 0.07632 |
| 20525_at  | 20525  | Slc2a1        | solute carrier family 2 (facilitated glucose transporter), member 1                              | 519.761 | -1.1709 | 0.03612 | 0.09924 |
| 58916_at  | 58916  | Myot          | myotilin                                                                                         | 1121.92 | -1.5053 | 0.03614 | 0.25428 |
| 435804_at | 435804 | Olfir1335     | olfactory receptor 1335                                                                          | 128.528 | -1.2495 | 0.03641 | 0.12993 |
| 622589_at | 622589 | Gm6336        | predicted gene 6336                                                                              | 1744.31 | -1.1446 | 0.03659 | 0.09163 |
| 546166_at | 546166 | Gm5922        | predicted gene 5922                                                                              | 42.0744 | -1.2042 | 0.03678 | 0.09798 |

|              |        |               |                                                                                                |         |         |         |         |
|--------------|--------|---------------|------------------------------------------------------------------------------------------------|---------|---------|---------|---------|
| 19661_at     | 19661  | Rbp3          | retinol binding protein 3, interstitial                                                        | 35.5832 | -1.2063 | 0.0368  | 0.10053 |
| 240156_at    | 240156 | Gm4947        | predicted gene 4947                                                                            | 212.45  | -1.1963 | 0.03687 | 0.10753 |
| 230674_at    | 230674 | Kdm4a         | lysine (K)-specific demethylase 4A                                                             | 758.877 | -1.1499 | 0.037   | 0.09118 |
| 171185_at    | 171185 | V1rc12        | vomer nasal 1 receptor, C12                                                                    | 11.6727 | -1.2057 | 0.03703 | 0.11255 |
| 100043129_at | 1E+08  | Gm4248        | high mobility group nucleosomal binding domain 2 pseudogene                                    | 46.8302 | -1.2311 | 0.0371  | 0.1136  |
| 67731_at     | 67731  | Fbxo32        | F-box protein 32                                                                               | 1539.2  | -1.2855 | 0.03713 | 0.16003 |
| 11504_at     | 11504  | Adamts1       | a disintegrin-like and metalloproteinase (reprolysin type) with thrombospondin type 1 motif, 1 | 515.424 | -1.1864 | 0.03719 | 0.10788 |
| 71986_at     | 71986  | Ddx28         | DEAD (Asp-Glu-Ala-Asp) box polypeptide 28                                                      | 112.931 | -1.178  | 0.0372  | 0.08861 |
| 14104_at     | 14104  | Fasn          | fatty acid synthase                                                                            | 235.109 | -1.1676 | 0.03754 | 0.09318 |
| 72224_at     | 72224  | 1700001J11Rik | RIKEN cDNA 1700001J11 gene                                                                     | 59.8156 | -1.1812 | 0.03763 | 0.08303 |
| 209776_at    | 209776 | Gpr139        | G protein-coupled receptor 139                                                                 | 88.1782 | -1.3195 | 0.03783 | 0.16306 |
| 100041826_at | 1E+08  | Gm10182       | predicted gene 10182                                                                           | 783.574 | -1.1225 | 0.03802 | 0.07777 |
| 73259_at     | 73259  | Cib4          | calcium and integrin binding family member 4                                                   | 45.453  | -1.2889 | 0.0381  | 0.14631 |
| 100042605_at | 1E+08  | Gm3925        | predicted gene 3925                                                                            | 105.745 | -1.2224 | 0.03833 | 0.11421 |
| 18145_at     | 18145  | Npc1          | Niemann Pick type C1                                                                           | 1603.04 | -1.1519 | 0.03834 | 0.09582 |
| 17433_at     | 17433  | Mobp          | myelin-associated oligodendrocytic basic protein                                               | 46.3334 | -1.201  | 0.03846 | 0.09708 |
| 70065_at     | 70065  | Ankrd60       | ankyrin repeat domain 60                                                                       | 40.8336 | -1.1873 | 0.03853 | 0.08919 |
| 72330_at     | 72330  | Kbtbd5        | kelch repeat and BTB (POZ) domain containing 5                                                 | 116.776 | -1.261  | 0.03867 | 0.13691 |
| 228801_at    | 228801 | U46068        | cDNA sequence U46068                                                                           | 44.3387 | -1.2297 | 0.03872 | 0.11456 |
| 71889_at     | 71889  | Epn3          | epsin 3                                                                                        | 700.438 | -1.2678 | 0.03884 | 0.1513  |
| 20202_at     | 20202  | S100a9        | S100 calcium binding protein A9 (calgranulin B)                                                | 55.9205 | -1.199  | 0.03887 | 0.0955  |
| 258238_at    | 258238 | Olf417        | olfactory receptor 417                                                                         | 114.813 | -1.2116 | 0.03888 | 0.10991 |
| 20211_at     | 20211  | Saa4          | serum amyloid A 4                                                                              | 22.5647 | -1.3035 | 0.03889 | 0.15931 |
| 18845_at     | 18845  | Plxna2        | plexin A2                                                                                      | 431.571 | -1.1624 | 0.0389  | 0.09535 |
| 24131_at     | 24131  | Ldb3          | LIM domain binding 3                                                                           | 2524.51 | -1.1316 | 0.03907 | 0.08829 |
| 216749_at    | 216749 | Nmur2         | neuromedin U receptor 2                                                                        | 30.9594 | -1.2068 | 0.03914 | 0.1043  |
| 12759_at     | 12759  | Clu           | clusterin                                                                                      | 2644.01 | -1.3668 | 0.0392  | 0.20106 |
| 211482_at    | 211482 | Efha          | EF hand domain family, member B                                                                | 19.1164 | -1.1798 | 0.03929 | 0.09465 |
| 99571_at     | 99571  | Fgg           | fibrinogen gamma chain                                                                         | 17.8682 | -1.1973 | 0.03948 | 0.1056  |
| 381707_at    | 381707 | LOC381707     | hypothetical LOC381707                                                                         | 155.121 | -1.3512 | 0.03948 | 0.18574 |
| 257926_at    | 257926 | Olf454        | olfactory receptor 544                                                                         | 24.0053 | -1.192  | 0.03954 | 0.09901 |
| 170758_at    | 170758 | Rac3          | RAS-related C3 botulinum substrate 3                                                           | 80.112  | -1.2071 | 0.03955 | 0.10285 |
| 18583_at     | 18583  | Pde7a         | phosphodiesterase 7A                                                                           | 1168.61 | -1.1383 | 0.0396  | 0.08855 |
| 11512_at     | 11512  | Adcy6         | adenylate cyclase 6                                                                            | 1272.71 | -1.2111 | 0.03968 | 0.12575 |
| 244668_at    | 244668 | Sipa112       | signal-induced proliferation-associated 1 like 2                                               | 397.62  | -1.1756 | 0.03975 | 0.10247 |
| 545683_at    | 545683 | Gm13213       | predicted gene 13213                                                                           | 286.039 | -1.1675 | 0.03975 | 0.09592 |
| 433766_at    | 433766 | Trim63        | tripartite motif-containing 63                                                                 | 1351.23 | -1.227  | 0.03998 | 0.13404 |
| 666244_at    | 666244 | Tmsb15b1      | thymosin beta 15b1                                                                             | 9.84223 | -1.1387 | 0.04051 | 0.07963 |
| 234072_at    | 234072 | Adprh1        | ADP-ribosylhydrolase like 1                                                                    | 4681    | -1.1372 | 0.04058 | 0.09565 |
| 381823_at    | 381823 | Apold1        | apolipoprotein L domain containing 1                                                           | 541.891 | -1.1994 | 0.04082 | 0.11741 |
| 68738_at     | 68738  | Acss1         | acyl-CoA synthetase short-chain family member 1                                                | 3768.08 | -1.1389 | 0.04146 | 0.09555 |
| 74178_at     | 74178  | Stk40         | serine/threonine kinase 40                                                                     | 702.185 | -1.1366 | 0.04152 | 0.08611 |



|              |        |               |                                                                                       |         |         |         |         |
|--------------|--------|---------------|---------------------------------------------------------------------------------------|---------|---------|---------|---------|
| 216439_at    | 216439 | Agap2         | ArfGAP with GTPase domain, ankyrin repeat and PH domain 2                             | 154.947 | -1.1852 | 0.04182 | 0.10167 |
| 332131_at    | 332131 | Krt78         | keratin 78                                                                            | 57.2441 | -1.2043 | 0.04182 | 0.1013  |
| 12984_at     | 12984  | Csf2rb2       | colony stimulating factor 2 receptor, beta 2, low-affinity (granulocyte-macrophage)   | 48.1038 | -1.2944 | 0.04186 | 0.15319 |
| 72555_at     | 72555  | 2700045P11Rik | RIKEN cDNA 2700045P11 gene                                                            | 160.087 | -1.1831 | 0.04196 | 0.101   |
| 209294_at    | 209294 | Csta          | cystatin A                                                                            | 8.95412 | -1.1365 | 0.04206 | 0.08026 |
| 71375_at     | 71375  | Foxn3         | forkhead box N3                                                                       | 465.937 | -1.1569 | 0.04209 | 0.09471 |
| 231885_at    | 231885 | Gm4871        | predicted gene 4871                                                                   | 27.1325 | -1.3366 | 0.0421  | 0.17817 |
| 241489_at    | 241489 | Pde11a        | phosphodiesterase 11A                                                                 | 119.925 | -1.2632 | 0.04213 | 0.1418  |
| 11634_at     | 11634  | Aire          | autoimmune regulator (autoimmune polyendocrinopathy candidiasis ectodermal dystrophy) | 123.08  | -1.2175 | 0.04214 | 0.11707 |
| 16660_at     | 16660  | Krt31         | keratin 31                                                                            | 60.0266 | -1.2944 | 0.04237 | 0.15342 |
| 16514_at     | 16514  | Kcnj11        | potassium inwardly rectifying channel, subfamily J, member 11                         | 976.725 | -1.1651 | 0.04238 | 0.10311 |
| 27261_at     | 27261  | Dok3          | docking protein 3                                                                     | 158.686 | -1.152  | 0.04252 | 0.08277 |
| 545989_at    | 545989 | Gm5901        | predicted gene 5901                                                                   | 69.6387 | -1.2739 | 0.04255 | 0.1429  |
| 319848_at    | 319848 | Slc17a4       | solute carrier family 17 (sodium phosphate), member 4                                 | 48.3233 | -1.1785 | 0.04258 | 0.08584 |
| 100705_at    | 100705 | Acacb         | acetyl-Coenzyme A carboxylase beta                                                    | 1617.62 | -1.1503 | 0.04278 | 0.0973  |
| 12335_at     | 12335  | Capn3         | calpain 3                                                                             | 136.866 | -1.2507 | 0.0429  | 0.13743 |
| 26366_at     | 26366  | Ceacam10      | carcinoembryonic antigen-related cell adhesion molecule 10                            | 31.3429 | -1.1739 | 0.0431  | 0.08693 |
| 12155_at     | 12155  | Bmp15         | bone morphogenetic protein 15                                                         | 32.9446 | -1.2577 | 0.04314 | 0.13635 |
| 55983_at     | 55983  | Pdzrn3        | PDZ domain containing RING finger 3                                                   | 395.546 | -1.1924 | 0.0434  | 0.11382 |
| 258541_at    | 258541 | Olfir800      | olfactory receptor 800                                                                | 26.9774 | -1.5067 | 0.04351 | 0.25944 |
| 217212_at    | 217212 | Pyy           | peptide YY                                                                            | 138.723 | -1.1953 | 0.04376 | 0.10739 |
| 26380_at     | 26380  | Esrrb         | estrogen related receptor, beta                                                       | 248.74  | -1.224  | 0.0438  | 0.12864 |
| 20400_at     | 20400  | Sh2d1a        | SH2 domain protein 1A                                                                 | 27.6394 | -1.1843 | 0.04382 | 0.09577 |
| 12348_at     | 12348  | Car11         | carbonic anhydrase 11                                                                 | 223.715 | -1.1431 | 0.04389 | 0.08251 |
| 14613_at     | 14613  | Gja5          | gap junction membrane channel protein alpha 5                                         | 140.843 | -1.1833 | 0.0439  | 0.10064 |
| 384813_at    | 384813 | Gm5346        | predicted gene 5346                                                                   | 69.8966 | -1.2832 | 0.04392 | 0.14937 |
| 12608_at     | 12608  | Cebpb         | CCAAT/enhancer binding protein (C/EBP), beta                                          | 325.803 | -1.2649 | 0.04397 | 0.15153 |
| 16779_at     | 16779  | Lamb2         | laminin, beta 2                                                                       | 2626.52 | -1.1328 | 0.04406 | 0.09126 |
| 14526_at     | 14526  | Gcg           | glucagon                                                                              | 33.713  | -1.188  | 0.04433 | 0.09604 |
| 100042747_at | 1E+08  | Gm4005        | predicted gene 4005                                                                   | 35.5718 | -1.1998 | 0.04459 | 0.1031  |
| 235320_at    | 235320 | Zbtb16        | zinc finger and BTB domain containing 16                                              | 929.987 | -1.409  | 0.04471 | 0.22516 |
| 14284_at     | 14284  | Fosl2         | fos-like antigen 2                                                                    | 342.327 | -1.1999 | 0.04481 | 0.11809 |
| 237781_at    | 237781 | Smcr7         | Smith-Magenis syndrome chromosome region, candidate 7 homolog (human)                 | 283.159 | -1.1531 | 0.04502 | 0.09079 |
| 76263_at     | 76263  | Gstk1         | glutathione S-transferase kappa 1                                                     | 1649.66 | -1.1492 | 0.04504 | 0.09794 |
| 67255_at     | 67255  | Zfp422        | zinc finger protein 422                                                               | 105.69  | -1.272  | 0.04538 | 0.14811 |
| 627009_at    | 627009 | Gm13125       | predicted gene 13125                                                                  | 33.2043 | -1.219  | 0.04541 | 0.11607 |
| 11732_at     | 11732  | Ank           | progressive ankylosis                                                                 | 1879.92 | -1.1613 | 0.04564 | 0.10505 |
| 75136_at     | 75136  | Rsph10b2      | radial spoke head 10 homolog B (Chlamydomonas)                                        | 43.7713 | -1.2134 | 0.04583 | 0.11111 |
| 338374_at    | 338374 | Il28b         | interleukin 28B                                                                       | 173.654 | -1.3892 | 0.04608 | 0.21266 |
| 100038380_at | 1E+08  | Gm10837       | predicted gene 10837                                                                  | 186.015 | -1.2297 | 0.04635 | 0.13191 |

|              |        |          |                                                                                |         |         |         |         |
|--------------|--------|----------|--------------------------------------------------------------------------------|---------|---------|---------|---------|
| 17962_at     | 17962  | Nat3     | N-acetyltransferase 3                                                          | 12.9297 | -1.1478 | 0.04636 | 0.08477 |
| 629750_at    | 629750 | Gm11517  | predicted gene 11517                                                           | 86.2125 | -1.2478 | 0.04653 | 0.13351 |
| 212943_at    | 212943 | Fam46a   | family with sequence similarity 46, member A                                   | 465.529 | -1.2159 | 0.04659 | 0.12947 |
| 64657_at     | 64657  | Mrps10   | mitochondrial ribosomal protein S10                                            | 159.429 | -1.2948 | 0.0469  | 0.16597 |
| 675815_at    | NA     | NA       | NA                                                                             | 206.12  | -1.158  | 0.04694 | 0.09228 |
| 626067_at    | 626067 | Gm6650   | predicted gene 6650                                                            | 11.4129 | -1.233  | 0.04713 | 0.13537 |
| 209588_at    | 209588 | Sectm1a  | secreted and transmembrane 1A                                                  | 32.0934 | -1.1806 | 0.04733 | 0.09401 |
| 434440_at    | 434440 | Fbxw12   | F-box and WD-40 domain protein 12                                              | 27.5288 | -1.2422 | 0.04738 | 0.13305 |
| 100042548_at | 1E+08  | Gm3898   | predicted gene 3898                                                            | 80.4573 | -1.1846 | 0.04738 | 0.09496 |
| 66853_at     | 66853  | Pnpla2   | patatin-like phospholipase domain containing 2                                 | 2131.4  | -1.1437 | 0.0476  | 0.09727 |
| 545548_at    | 545548 | Lce3a    | late cornified envelope 3A                                                     | 44.1194 | -1.2445 | 0.04764 | 0.13125 |
| 12497_at     | 12497  | Entpd6   | ectonucleoside triphosphate diphosphohydrolase 6                               | 504.484 | -1.1936 | 0.04769 | 0.11857 |
| 13629_at     | 13629  | Eef2     | eukaryotic translation elongation factor 2                                     | 4965.18 | -1.0919 | 0.04785 | 0.07715 |
| 67224_at     | 67224  | Med29    | mediator complex subunit 29                                                    | 381.692 | -1.1389 | 0.04788 | 0.08626 |
| 227580_at    | 227580 | C1q13    | C1q-like 3                                                                     | 26.7586 | -1.2153 | 0.04788 | 0.11807 |
| 227731_at    | 227731 | Slc25a25 | solute carrier family 25 (mitochondrial carrier, phosphate carrier), member 25 | 208.562 | -1.2085 | 0.0479  | 0.12216 |
| 210582_at    | 210582 | Coq10a   | coenzyme Q10 homolog A (yeast)                                                 | 814.9   | -1.1357 | 0.04796 | 0.08931 |
| 20848_at     | 20848  | Stat3    | signal transducer and activator of transcription 3                             | 2072.18 | -1.1833 | 0.048   | 0.11828 |
| 406176_at    | 406176 | Olf151   | olfactory receptor 151                                                         | 14.2865 | -1.1878 | 0.04837 | 0.10881 |
| 13009_at     | 13009  | Csrp3    | cysteine and glycine-rich protein 3                                            | 6601.41 | -1.0873 | 0.04851 | 0.07707 |
| 67838_at     | 67838  | Dnajb11  | DnaJ (Hsp40) homolog, subfamily B, member 11                                   | 862.674 | -1.1246 | 0.04855 | 0.08378 |
| 12614_at     | 12614  | Celsr1   | cadherin, EGF LAG seven-pass G-type receptor 1 (flamingo homolog, Drosophila)  | 172.366 | -1.134  | 0.0486  | 0.07613 |
| 18125_at     | 18125  | Nos1     | nitric oxide synthase 1, neuronal                                              | 75.1423 | -1.1948 | 0.04876 | 0.10198 |
| 574403_at    | 574403 | Gm6041   | predicted gene 6041                                                            | 54.0292 | -1.2512 | 0.04901 | 0.13581 |
| 20480_at     | 20480  | Clpb     | ClpB caseinolytic peptidase B homolog (E. coli)                                | 868.791 | -1.1481 | 0.04908 | 0.09697 |
| 193740_at    | 193740 | Hspa1a   | heat shock protein 1A                                                          | 348.283 | -1.4228 | 0.04911 | 0.23481 |
| 15407_at     | 15407  | Hoxb1    | homeo box B1                                                                   | 108.25  | -1.203  | 0.04915 | 0.11198 |
| 668539_at    | 668539 | Gm9229   | predicted gene 9229                                                            | 39.2477 | -1.561  | 0.04947 | 0.29129 |
| 433224_at    | 433224 | Gm5512   | required for meiotic nuclear division 1 pseudogene                             | 17.5981 | -1.2564 | 0.04975 | 0.14701 |
| 20536_at     | 20536  | Slc4a3   | solute carrier family 4 (anion exchanger), member 3                            | 2199.18 | -1.1442 | 0.04976 | 0.09866 |
| 230126_at    | 230126 | Shb      | src homology 2 domain-containing transforming protein B                        | 234.84  | -1.1345 | 0.04979 | 0.08074 |
| 665772_at    | 665772 | Gm7780   | predicted gene 7780                                                            | 300.414 | -1.176  | 0.04994 | 0.10717 |
| 665716_at    | 665716 | Gm7755   | predicted gene 7755                                                            | 178.843 | -1.1754 | 0.04997 | 0.10296 |

**Table S3. Alteration of predicted miR-494 target genes (Target-Scan) in miR-494 hearts**

| Probe     | Gene   | Symbol        | Name                                                                                        | Intensity | Fold (TG/WT) | P value | Std  |
|-----------|--------|---------------|---------------------------------------------------------------------------------------------|-----------|--------------|---------|------|
| 11910_at  | 11910  | Atf3          | activating transcription factor 3                                                           | 322.26    | -1.45        | 0.01    | 0.16 |
| 12125_at  | 12125  | Bcl2l11       | BCL2-like 11 (apoptosis facilitator)                                                        | 213.02    | -1.27        | 0.01    | 0.11 |
| 268860_at | 268860 | Abat          | 4-aminobutyrate aminotransferase                                                            | 359.44    | -1.32        | 0.02    | 0.15 |
| 57752_at  | 57752  | Tacc2         | transforming, acidic coiled-coil containing protein 2                                       | 1607.3    | -1.21        | 0.03    | 0.12 |
| 70611_at  | 70611  | Fbxo33        | F-box protein 33                                                                            | 199.5     | 1.18         | 0.03    | 0.1  |
| 18193_at  | 18193  | Nsd1          | nuclear receptor-binding SET-domain protein 1                                               | 915.91    | 1.12         | 0.04    | 0.08 |
| 319653_at | 319653 | Slc25a40      | solute carrier family 25, member 40                                                         | 443.2     | 1.13         | 0.06    | 0.09 |
| 268902_at | 268902 | Robo2         | roundabout homolog 2 (Drosophila)                                                           | 94.17     | 1.16         | 0.07    | 0.1  |
| 68107_at  | 68107  | Cntd1         | cyclin N-terminal domain containing 1                                                       | 30.87     | 1.16         | 0.11    | 0.12 |
| 60611_at  | 60611  | Foxj2         | forkhead box J2                                                                             | 471.2     | -1.12        | 0.11    | 0.1  |
| 20893_at  | 20893  | Bhlhe40       | basic helix-loop-helix family, member e40                                                   | 484.52    | -1.26        | 0.12    | 0.2  |
| 80889_at  | 80889  | Mesdc1        | mesoderm development candidate 1                                                            | 119.77    | 1.14         | 0.12    | 0.11 |
| 74148_at  | 74148  | 1300001I01Rik | RIKEN cDNA 1300001I01 gene                                                                  | 2851.8    | -1.1         | 0.13    | 0.09 |
| 234267_at | 234267 | Gpm6a         | glycoprotein m6a                                                                            | 289.12    | 1.28         | 0.13    | 0.22 |
| 13803_at  | 13803  | Enc1          | ectodermal-neural cortex 1                                                                  | 282.43    | -1.12        | 0.13    | 0.11 |
| 54446_at  | 54446  | Nfat5         | nuclear factor of activated T-cells 5                                                       | 539.74    | 1.1          | 0.14    | 0.09 |
| 66704_at  | 66704  | Rbm4b         | RNA binding motif protein 4B                                                                | 281.55    | -1.11        | 0.14    | 0.1  |
| 230233_at | 230233 | lkbkap        | inhibitor of kappa light polypeptide enhancer in B-cells, kinase complex-associated protein | 545.14    | -1.1         | 0.14    | 0.09 |
| 319478_at | 319478 | Cxxc4         | CXXC finger 4                                                                               | 57.03     | 1.11         | 0.14    | 0.08 |
| 16878_at  | 16878  | Lif           | leukemia inhibitory factor                                                                  | 45.85     | -1.18        | 0.15    | 0.14 |
| 17153_at  | 17153  | Mal           | myelin and lymphocyte protein, T-cell differentiation protein                               | 251.68    | -1.21        | 0.15    | 0.18 |
| 28018_at  | 28018  | Ubfd1         | ubiquitin family domain containing 1                                                        | 927       | -1.1         | 0.16    | 0.09 |
| 16911_at  | 16911  | Lmo4          | LIM domain only 4                                                                           | 597.66    | 1.11         | 0.16    | 0.1  |
| 67886_at  | 67886  | Camsap111     | calmodulin regulated spectrin-associated protein 1-like 1                                   | 610.86    | 1.09         | 0.16    | 0.09 |
| 12013_at  | 12013  | Bach1         | BTB and CNC homology 1                                                                      | 616.65    | -1.09        | 0.17    | 0.09 |
| 170791_at | 170791 | Rbm39         | RNA binding motif protein 39                                                                | 2368.9    | 1.07         | 0.18    | 0.08 |
| 16210_at  | 16210  | Impact        | imprinted and ancient                                                                       | 1250.3    | -1.14        | 0.18    | 0.14 |
| 14536_at  | 14536  | Nr6a1         | nuclear receptor subfamily 6, group A, member 1                                             | 120.03    | -1.11        | 0.18    | 0.1  |
| 68292_at  | 68292  | Stt3b         | STT3, subunit of the oligosaccharyltransferase complex, homolog B ( <i>S. cerevisiae</i> )  | 1313.1    | -1.07        | 0.18    | 0.08 |
| 14007_at  | 14007  | Cugbp2        | CUG triplet repeat, RNA binding protein 2                                                   | 376.07    | -1.09        | 0.18    | 0.09 |
| 21841_at  | 21841  | Tia1          | cytotoxic granule-associated RNA binding protein 1                                          | 623.72    | 1.08         | 0.19    | 0.08 |
| 53622_at  | 53622  | Krt85         | keratin 85                                                                                  | 57.26     | 1.26         | 0.19    | 0.24 |
| 22589_at  | 22589  | Atrx          | alpha thalassemia/mental retardation syndrome X-linked homolog (human)                      | 957.54    | 1.08         | 0.19    | 0.09 |
| 15191_at  | 15191  | Hdgf          | hepatoma-derived growth factor                                                              | 866.18    | -1.09        | 0.19    | 0.1  |
| 19877_at  | 19877  | Rock1         | Rho-associated coiled-coil containing protein kinase 1                                      | 1293.7    | 1.07         | 0.2     | 0.08 |
| 215449_at | 215449 | Rap1b         | RAS related protein 1b                                                                      | 2863.3    | 1.08         | 0.2     | 0.09 |
| 241694_at | 241694 | A230067G21Rik | RIKEN cDNA A230067G21 gene                                                                  | 1025.2    | 1.09         | 0.2     | 0.1  |

|           |        |               |                                                                        |        |       |      |      |
|-----------|--------|---------------|------------------------------------------------------------------------|--------|-------|------|------|
| 18935_at  | 18935  | Phox2b        | paired-like homeobox 2b                                                | 67.01  | -1.11 | 0.21 | 0.09 |
| 66975_at  | 66975  | 2410002O22Rik | RIKEN cDNA 2410002O22 gene                                             | 1041.5 | 1.07  | 0.21 | 0.08 |
| 217869_at | 217869 | Eif5          | eukaryotic translation initiation factor 5                             | 2199   | 1.06  | 0.21 | 0.08 |
| 16001_at  | 16001  | Igf1r         | insulin-like growth factor I receptor                                  | 320.85 | -1.09 | 0.21 | 0.09 |
| 22196_at  | 22196  | Ube2i         | ubiquitin-conjugating enzyme E2I                                       | 1582   | -1.11 | 0.21 | 0.13 |
| 211255_at | 211255 | Kbtbd7        | kelch repeat and BTB (POZ) domain containing 7                         | 228.7  | -1.13 | 0.22 | 0.14 |
| 15078_at  | 15078  | H3f3a         | H3 histone, family 3A                                                  | 15.48  | 1.18  | 0.23 | 0.19 |
| 105855_at | 105855 | Nckap1l       | NCK associated protein 1 like                                          | 242.8  | 1.09  | 0.25 | 0.1  |
| 245572_at | 245572 | Tbx22         | T-box 22                                                               | 26.83  | -1.1  | 0.25 | 0.11 |
| 18488_at  | 18488  | Cntn3         | contactin 3                                                            | 26.31  | -1.09 | 0.25 | 0.1  |
| 226518_at | 226518 | Nmnat2        | nicotinamide nucleotide adenyltransferase 2                            | 112.43 | -1.11 | 0.25 | 0.11 |
| 52348_at  | 52348  | Vps37a        | vacuolar protein sorting 37A (yeast)                                   | 371.26 | 1.07  | 0.26 | 0.08 |
| 69257_at  | 69257  | Elf2          | E74-like factor 2                                                      | 885.15 | -1.06 | 0.27 | 0.08 |
| 15081_at  | 15081  | H3f3b         | H3 histone, family 3B                                                  | 2552.4 | 1.1   | 0.28 | 0.14 |
| 226409_at | 226409 | Zranb3        | zinc finger, RAN-binding domain containing 3                           | 198.13 | 1.08  | 0.28 | 0.09 |
| 140486_at | 140486 | Igf2bp1       | insulin-like growth factor 2 mRNA binding protein 1                    | 54.34  | -1.11 | 0.28 | 0.12 |
| 18751_at  | 18751  | Prkcb         | protein kinase C, beta                                                 | 101.13 | -1.09 | 0.29 | 0.11 |
| 228491_at | 228491 | Zfp770        | zinc finger protein 770                                                | 412.27 | 1.1   | 0.3  | 0.14 |
| 245555_at | 245555 | C77370        | expressed sequence C77370                                              | 20.27  | -1.08 | 0.3  | 0.1  |
| 77799_at  | 77799  | Sla2          | Src-like-adaptor 2                                                     | 95.03  | -1.1  | 0.3  | 0.12 |
| 56363_at  | 56363  | Tmeff2        | transmembrane protein with EGF-like and two follistatin-like domains 2 | 29.06  | -1.1  | 0.3  | 0.12 |
| 320924_at | 320924 | Ccbe1         | collagen and calcium binding EGF domains 1                             | 138.48 | -1.1  | 0.31 | 0.12 |
| 70571_at  | 70571  | Tcerg1l       | transcription elongation regulator 1-like                              | 77.37  | -1.09 | 0.33 | 0.11 |
| 12934_at  | 12934  | Dpysl2        | dihydropyrimidinase-like 2                                             | 1883   | 1.07  | 0.33 | 0.11 |
| 215280_at | 215280 | Wipf1         | WAS/WASL interacting protein family, member 1                          | 159.56 | 1.07  | 0.34 | 0.09 |
| 100017_at | 100017 | Ldlrap1       | low density lipoprotein receptor adaptor protein 1                     | 288.75 | 1.06  | 0.34 | 0.08 |
| 21780_at  | 21780  | Tfam          | transcription factor A, mitochondrial                                  | 473.8  | 1.07  | 0.34 | 0.11 |
| 269275_at | 269275 | Acvr1c        | activin A receptor, type IC                                            | 23.18  | 1.08  | 0.35 | 0.11 |
| 16324_at  | 16324  | Inhbb         | inhibin beta-B                                                         | 82.37  | -1.09 | 0.35 | 0.12 |
| 328949_at | 328949 | Mcc           | mutated in colorectal cancers                                          | 686.23 | 1.08  | 0.36 | 0.12 |
| 207212_at | 207212 | Arhgef17      | Rho guanine nucleotide exchange factor (GEF) 17                        | 331.07 | 1.05  | 0.36 | 0.08 |
| 213491_at | 213491 | D4Ert22e      | DNA segment, Chr 4, ERATO Doi 22, expressed                            | 972.2  | -1.06 | 0.37 | 0.1  |
| 13593_at  | 13593  | Ebf3          | early B-cell factor 3                                                  | 224.69 | 1.07  | 0.37 | 0.1  |
| 110611_at | 110611 | Hdlbp         | high density lipoprotein (HDL) binding protein                         | 5514.7 | -1.05 | 0.37 | 0.09 |
| 20269_at  | 20269  | Scn3a         | sodium channel, voltage-gated, type III, alpha                         | 84.48  | -1.1  | 0.37 | 0.15 |
| 13487_at  | 13487  | Slc26a3       | solute carrier family 26, member 3                                     | 36.09  | 1.1   | 0.37 | 0.14 |
| 56403_at  | 56403  | Syncrip       | synaptotagmin binding, cytoplasmic RNA interacting protein             | 1872.3 | 1.05  | 0.38 | 0.09 |
| 212391_at | 212391 | Lcor          | ligand dependent nuclear receptor corepressor                          | 525.52 | 1.05  | 0.38 | 0.08 |
| 240660_at | 240660 | Tmem20        | transmembrane protein 20                                               | 252.48 | -1.05 | 0.38 | 0.08 |
| 59125_at  | 59125  | Nek7          | NIMA (never in mitosis gene a)-related expressed kinase 7              | 1733.9 | -1.04 | 0.39 | 0.08 |
| 78521_at  | 78521  | B230219D22Rik | RIKEN cDNA B230219D22 gene                                             | 1625.4 | 1.04  | 0.39 | 0.08 |

|           |        |               |                                                        |        |       |      |      |
|-----------|--------|---------------|--------------------------------------------------------|--------|-------|------|------|
| 23859_at  | 23859  | Dlg2          | discs, large homolog 2 (Drosophila)                    | 87.36  | -1.07 | 0.39 | 0.11 |
| 103268_at | 103268 | 2410017P07Rik | RIKEN cDNA 2410017P07 gene                             | 69.4   | -1.06 | 0.4  | 0.08 |
| 214162_at | 214162 | Mll1          | myeloid/lymphoid or mixed-lineage leukemia 1           | 611.22 | -1.06 | 0.41 | 0.11 |
| 71777_at  | 71777  | Ing3          | inhibitor of growth family, member 3                   | 326.8  | -1.05 | 0.42 | 0.08 |
| 109594_at | 109594 | Lmo1          | LIM domain only 1                                      | 48.66  | 1.07  | 0.42 | 0.1  |
| 68465_at  | 68465  | Adipor2       | adiponectin receptor 2                                 | 965.34 | -1.06 | 0.42 | 0.11 |
| 76901_at  | 76901  | Phf15         | PHD finger protein 15                                  | 213.74 | -1.08 | 0.42 | 0.14 |
| 70900_at  | 70900  | 4921517D22Rik | RIKEN cDNA 4921517D22 gene                             | 53.29  | -1.08 | 0.42 | 0.12 |
| 213988_at | 213988 | Tnrc6b        | trinucleotide repeat containing 6b                     | 790.94 | -1.05 | 0.42 | 0.09 |
| 241568_at | 241568 | Lrrc4c        | leucine rich repeat containing 4C                      | 19.88  | -1.07 | 0.43 | 0.12 |
| 74206_at  | 74206  | Sipa1l3       | signal-induced proliferation-associated 1 like 3       | 198.94 | -1.07 | 0.44 | 0.13 |
| 106143_at | 106143 | Cggbp1        | CGG triplet repeat binding protein 1                   | 468.42 | 1.05  | 0.44 | 0.09 |
| 54710_at  | 54710  | Hs3st3b1      | heparan sulfate (glucosamine) 3-O-sulfotransferase 3B1 | 120.6  | -1.06 | 0.44 | 0.11 |
| 140780_at | 140780 | Bmp2k         | BMP2 inducible kinase                                  | 170.46 | 1.07  | 0.44 | 0.12 |
| 14183_at  | 14183  | Fgfr2         | fibroblast growth factor receptor 2                    | 35.39  | -1.06 | 0.44 | 0.1  |
| 218335_at | 218335 | Clptm1l       | CLPTM1-like                                            | 1133   | -1.05 | 0.45 | 0.1  |
| 11855_at  | 11855  | Arhgap5       | Rho GTPase activating protein 5                        | 1115   | 1.04  | 0.45 | 0.09 |
| 320165_at | 320165 | Tacc1         | transforming, acidic coiled-coil containing protein 1  | 929.39 | -1.04 | 0.46 | 0.08 |
| 217039_at | 217039 | Ggnbp2        | gametogenetin binding protein 2                        | 1098.3 | 1.05  | 0.47 | 0.1  |
| 54124_at  | 54124  | Cks1b         | CDC28 protein kinase 1b                                | 112.88 | 1.06  | 0.47 | 0.1  |
| 22415_at  | 22415  | Wnt3          | wingless-related MMTV integration site 3               | 57.52  | -1.05 | 0.47 | 0.09 |
| 234135_at | 234135 | Whsc1l1       | Wolf-Hirschhorn syndrome candidate 1-like 1 (human)    | 486.71 | 1.06  | 0.47 | 0.12 |
| 18542_at  | 18542  | Pcolce        | procollagen C-endopeptidase enhancer protein           | 983.93 | -1.04 | 0.47 | 0.08 |
| 69053_at  | 69053  | 1810013L24Rik | RIKEN cDNA 1810013L24 gene                             | 1551.5 | -1.04 | 0.48 | 0.09 |
| 18771_at  | 18771  | Pknox1        | Pbx/knotted 1 homeobox                                 | 225.22 | -1.05 | 0.48 | 0.1  |
| 217082_at | 217082 | Hlf           | hepatic leukemia factor                                | 310.44 | 1.06  | 0.48 | 0.11 |
| 12032_at  | 12032  | Bcan          | brevican                                               | 38.9   | -1.08 | 0.5  | 0.15 |
| 67684_at  | 67684  | 3300001P08Rik | RIKEN cDNA 3300001P08 gene                             | 2123.5 | 1.05  | 0.5  | 0.11 |
| 22031_at  | 22031  | Traf3         | TNF receptor-associated factor 3                       | 229.06 | 1.04  | 0.5  | 0.09 |
| 99031_at  | 99031  | Osbpl6        | oxysterol binding protein-like 6                       | 342.76 | -1.06 | 0.52 | 0.13 |
| 53323_at  | 53323  | Ube2k         | ubiquitin-conjugating enzyme E2K (UBC1 homolog, yeast) | 1919.4 | 1.03  | 0.53 | 0.08 |
| 224224_at | 224224 | Impg2         | interphotoreceptor matrix proteoglycan 2               | 17.96  | -1.05 | 0.53 | 0.12 |
| 76707_at  | 76707  | Clasp1        | CLIP associating protein 1                             | 2931.3 | -1.03 | 0.53 | 0.09 |
| 71902_at  | 71902  | Cand1         | cullin associated and neddylation disassociated 1      | 721.23 | 1.04  | 0.55 | 0.09 |
| 73379_at  | 73379  | Dcbld2        | discoidin, CUB and LCCL domain containing 2            | 396.36 | 1.04  | 0.56 | 0.09 |
| 16478_at  | 16478  | Jund          | Jun proto-oncogene related gene d                      | 509.57 | -1.05 | 0.57 | 0.12 |
| 17476_at  | 17476  | Mpeg1         | macrophage expressed gene 1                            | 228.13 | 1.04  | 0.58 | 0.11 |
| 11431_at  | 11431  | Acp1          | acid phosphatase 1, soluble                            | 191.89 | -1.05 | 0.59 | 0.14 |
| 18741_at  | 18741  | Pitx2         | paired-like homeodomain transcription factor 2         | 50.14  | -1.04 | 0.59 | 0.09 |
| 17933_at  | 17933  | Myt1l         | myelin transcription factor 1-like                     | 86.83  | -1.04 | 0.61 | 0.1  |
| 53860_at  | 53860  | 9-Sep         | septin 9                                               | 382.79 | -1.03 | 0.61 | 0.09 |
| 14806_at  | 14806  | Grik2         | glutamate receptor, ionotropic, kainate 2 (beta 2)     | 49.32  | -1.04 | 0.61 | 0.1  |

|           |        |               |                                                                     |        |       |      |      |
|-----------|--------|---------------|---------------------------------------------------------------------|--------|-------|------|------|
| 30791_at  | 30791  | Slc39a1       | solute carrier family 39 (zinc transporter), member 1               | 836.71 | -1.04 | 0.61 | 0.1  |
| 71653_at  | 71653  | 4930506M07Rik | RIKEN cDNA 4930506M07 gene                                          | 112.62 | 1.04  | 0.61 | 0.11 |
| 330409_at | 330409 | Cecr2         | cat eye syndrome chromosome region, candidate 2 homolog (human)     | 198.92 | -1.04 | 0.62 | 0.12 |
| 12638_at  | 12638  | Cftr          | cystic fibrosis transmembrane conductance regulator homolog         | 22.62  | -1.04 | 0.62 | 0.09 |
| 217371_at | 217371 | Rab40b        | Rab40b, member RAS oncogene family                                  | 133.38 | -1.03 | 0.62 | 0.09 |
| 230753_at | 230753 | Thrap3        | thyroid hormone receptor associated protein 3                       | 1733.7 | 1.03  | 0.63 | 0.09 |
| 70640_at  | 70640  | Dcp2          | DCP2 decapping enzyme homolog (S. cerevisiae)                       | 216.17 | 1.04  | 0.63 | 0.1  |
| 225027_at | 225027 | Sfrs7         | splicing factor, arginine/serine-rich 7                             | 1266.5 | 1.03  | 0.64 | 0.09 |
| 320538_at | 320538 | Ubn2          | ubinnuclein 2                                                       | 588.28 | -1.03 | 0.64 | 0.09 |
| 239555_at | 239555 | Smcr7l        | Smith-Magenis syndrome chromosome region, candidate 7-like (human)  | 385.74 | 1.04  | 0.64 | 0.11 |
| 245386_at | 245386 | Fam70a        | family with sequence similarity 70, member A                        | 56.36  | -1.03 | 0.65 | 0.08 |
| 76884_at  | 76884  | Cyfp2         | cytoplasmic FMR1 interacting protein 2                              | 338.2  | 1.08  | 0.66 | 0.24 |
| 83925_at  | 83925  | Trps1         | trichorhinophalangeal syndrome I (human)                            | 355.36 | 1.06  | 0.66 | 0.18 |
| 272027_at | 272027 | BC057893      | cDNA sequence BC057893                                              | 373.17 | 1.03  | 0.67 | 0.1  |
| 18072_at  | 18072  | Nhlh2         | nescient helix loop helix 2                                         | 58.48  | -1.04 | 0.67 | 0.14 |
| 12033_at  | 12033  | Bcap29        | B-cell receptor-associated protein 29                               | 1263.4 | -1.03 | 0.68 | 0.12 |
| 108946_at | 108946 | Zzz3          | zinc finger, ZZ domain containing 3                                 | 640.06 | 1.03  | 0.68 | 0.1  |
| 223881_at | 223881 | Rnd1          | Rho family GTPase 1                                                 | 69.98  | -1.03 | 0.68 | 0.1  |
| 18197_at  | 18197  | Nsg2          | neuron specific gene family member 2                                | 43.45  | -1.03 | 0.68 | 0.11 |
| 67468_at  | 67468  | Mmd           | monocyte to macrophage differentiation-associated                   | 478.47 | 1.04  | 0.69 | 0.13 |
| 69091_at  | 69091  | Vps26b        | vacuolar protein sorting 26 homolog B (yeast)                       | 715.34 | 1.03  | 0.69 | 0.1  |
| 16443_at  | 16443  | Itns1         | intersectin 1 (SH3 domain protein 1A)                               | 479.89 | -1.02 | 0.7  | 0.09 |
| 55980_at  | 55980  | Impa1         | inositol (myo)-1(or 4)-monophosphatase 1                            | 328.73 | 1.03  | 0.7  | 0.11 |
| 232798_at | 232798 | Leng8         | leukocyte receptor cluster (LRC) member 8                           | 649.91 | 1.03  | 0.7  | 0.13 |
| 231769_at | 231769 | Sfrs8         | splicing factor, arginine/serine-rich 8                             | 423.62 | -1.02 | 0.7  | 0.09 |
| 13511_at  | 13511  | Dsg2          | desmoglein 2                                                        | 578.69 | -1.03 | 0.71 | 0.1  |
| 68051_at  | 68051  | Nutf2         | nuclear transport factor 2                                          | 325.28 | -1.04 | 0.71 | 0.16 |
| 381695_at | 381695 | N4bp2l2       | NEDD4 binding protein 2-like 2                                      | 659.3  | 1.02  | 0.72 | 0.09 |
| 17536_at  | 17536  | Meis2         | Meis homeobox 2                                                     | 566.44 | 1.02  | 0.72 | 0.1  |
| 320595_at | 320595 | Phf8          | PHD finger protein 8                                                | 286.39 | 1.02  | 0.72 | 0.09 |
| 71833_at  | 71833  | Dcaf7         | DDB1 and CUL4 associated factor 7                                   | 1012.8 | -1.02 | 0.73 | 0.1  |
| 11906_at  | 11906  | Zfhx3         | zinc finger homeobox 3                                              | 230.02 | -1.03 | 0.73 | 0.12 |
| 77286_at  | 77286  | Nkrf          | NF-kappaB repressing factor                                         | 141.99 | 1.02  | 0.73 | 0.09 |
| 80892_at  | 80892  | Zfhx4         | zinc finger homeodomain 4                                           | 65.65  | -1.03 | 0.74 | 0.12 |
| 11800_at  | 11800  | Api5          | apoptosis inhibitor 5                                               | 702.43 | -1.02 | 0.74 | 0.08 |
| 15354_at  | 15354  | Hmgb3         | high mobility group box 3                                           | 694.88 | 1.05  | 0.74 | 0.21 |
| 17749_at  | 17749  | Polr2k        | polymerase (RNA) II (DNA directed) polypeptide K                    | 53.07  | -1.04 | 0.74 | 0.17 |
| 78808_at  | 78808  | Stxbp5        | syntaxin binding protein 5 (tomosyn)                                | 465.34 | -1.03 | 0.75 | 0.13 |
| 22221_at  | 22221  | Ubp1          | upstream binding protein 1                                          | 609.32 | 1.02  | 0.75 | 0.08 |
| 68801_at  | 68801  | Elov15        | ELOVL family member 5, elongation of long chain fatty acids (yeast) | 1035.2 | 1.02  | 0.75 | 0.08 |
| 12151_at  | 12151  | Bmi1          | Bmi1 polycomb ring finger oncogene                                  | 1548.4 | 1.02  | 0.76 | 0.08 |

|           |        |          |                                                                                                   |        |       |      |      |
|-----------|--------|----------|---------------------------------------------------------------------------------------------------|--------|-------|------|------|
| 108058_at | 108058 | Camk2d   | calcium/calmodulin-dependent protein kinase II, delta                                             | 2427.2 | -1.02 | 0.76 | 0.09 |
| 11977_at  | 11977  | Atp7a    | ATPase, Cu <sup>++</sup> transporting, alpha polypeptide                                          | 293.21 | -1.02 | 0.76 | 0.1  |
| 109205_at | 109205 | Sobp     | sine oculis-binding protein homolog (Drosophila)                                                  | 289.17 | 1.02  | 0.77 | 0.08 |
| 230700_at | 230700 | Foxj3    | forkhead box J3                                                                                   | 340.58 | 1.02  | 0.77 | 0.11 |
| 14634_at  | 14634  | Gli3     | GLI-Kruppel family member GLI3                                                                    | 73.08  | 1.04  | 0.77 | 0.16 |
| 22608_at  | 22608  | Ybx1     | Y box protein 1                                                                                   | 691.94 | 1.02  | 0.78 | 0.09 |
| 78798_at  | 78798  | Eml4     | echinoderm microtubule associated protein like 4                                                  | 272.36 | 1.02  | 0.78 | 0.08 |
| 170707_at | 170707 | Usp48    | ubiquitin specific peptidase 48                                                                   | 526.94 | -1.02 | 0.78 | 0.1  |
| 12444_at  | 12444  | Ccnd2    | cyclin D2                                                                                         | 2169.1 | 1.02  | 0.79 | 0.1  |
| 11982_at  | 11982  | Atp10a   | ATPase, class V, type 10A                                                                         | 91.36  | 1.02  | 0.79 | 0.11 |
| 19211_at  | 19211  | Pten     | phosphatase and tensin homolog                                                                    | 2633.6 | -1.01 | 0.79 | 0.08 |
| 77531_at  | 77531  | Anks1b   | ankyrin repeat and sterile alpha motif domain containing 1B                                       | 45.53  | -1.02 | 0.8  | 0.11 |
| 73251_at  | 73251  | Setd7    | SET domain containing (lysine methyltransferase) 7                                                | 404.96 | -1.01 | 0.8  | 0.08 |
| 216965_at | 216965 | Taok1    | TAO kinase 1                                                                                      | 1567.9 | 1.01  | 0.8  | 0.08 |
| 110648_at | 110648 | Lmx1a    | LIM homeobox transcription factor 1 alpha                                                         | 71.47  | 1.02  | 0.81 | 0.09 |
| 56809_at  | 56809  | Gmeb1    | glucocorticoid modulatory element binding protein 1                                               | 226.95 | 1.01  | 0.81 | 0.09 |
| 217517_at | 217517 | Stxbp6   | syntaxin binding protein 6 (amisyn)                                                               | 236.85 | 1.02  | 0.81 | 0.11 |
| 226442_at | 226442 | Zfp281   | zinc finger protein 281                                                                           | 470.86 | -1.01 | 0.82 | 0.1  |
| 242481_at | 242481 | Palm2    | paralemmin 2                                                                                      | 400.97 | -1.01 | 0.83 | 0.08 |
| 192185_at | 192185 | Nadk     | NAD kinase                                                                                        | 666.49 | -1.01 | 0.83 | 0.1  |
| 14897_at  | 14897  | Trip12   | thyroid hormone receptor interactor 12                                                            | 2304.3 | 1.01  | 0.84 | 0.08 |
| 69632_at  | 69632  | Arhgef12 | Rho guanine nucleotide exchange factor (GEF) 12                                                   | 2569.1 | -1.01 | 0.86 | 0.08 |
| 65962_at  | 65962  | Slc9a3r2 | solute carrier family 9 (sodium/hydrogen exchanger), member 3 regulator 2                         | 636.59 | -1.01 | 0.86 | 0.08 |
| 109241_at | 109241 | Mbd5     | methyl-CpG binding domain protein 5                                                               | 199.28 | -1.01 | 0.87 | 0.09 |
| 99375_at  | 99375  | Cul4a    | cullin 4A                                                                                         | 580.75 | -1.01 | 0.87 | 0.12 |
| 18028_at  | 18028  | Nfib     | nuclear factor I/B                                                                                | 2109.9 | -1.01 | 0.89 | 0.09 |
| 227960_at | 227960 | Gca      | grancalcin                                                                                        | 559.07 | 1.01  | 0.89 | 0.14 |
| 22780_at  | 22780  | Ikzf3    | IKAROS family zinc finger 3                                                                       | 43.77  | 1.01  | 0.89 | 0.12 |
| 22764_at  | 22764  | Zfx      | zinc finger protein X-linked                                                                      | 913.06 | 1.01  | 0.9  | 0.08 |
| 54610_at  | 54610  | Tbc1d8   | TBC1 domain family, member 8                                                                      | 131.44 | 1.01  | 0.91 | 0.1  |
| 226757_at | 226757 | Wdr26    | WD repeat domain 26                                                                               | 1207.8 | -1.01 | 0.91 | 0.09 |
| 22680_at  | 22680  | Zfp207   | zinc finger protein 207                                                                           | 1681.2 | -1.01 | 0.91 | 0.08 |
| 71835_at  | 71835  | Lancl2   | LanC (bacterial lantibiotic synthetase component C)-like 2                                        | 585.32 | -1.01 | 0.91 | 0.1  |
| 114873_at | 114873 | Dscaml1  | Down syndrome cell adhesion molecule-like 1                                                       | 59.3   | -1.01 | 0.91 | 0.12 |
| 27386_at  | 27386  | Npas3    | neuronal PAS domain protein 3                                                                     | 30.7   | -1.01 | 0.92 | 0.09 |
| 29808_at  | 29808  | Mga      | MAX gene associated                                                                               | 628.16 | -1.01 | 0.92 | 0.08 |
| 12145_at  | 12145  | Cxcr5    | chemokine (C-X-C motif) receptor 5                                                                | 20.29  | -1.01 | 0.93 | 0.12 |
| 67475_at  | 67475  | Ero1lb   | ERO1-like beta (S. cerevisiae)                                                                    | 148.34 | -1.01 | 0.93 | 0.11 |
| 80985_at  | 80985  | Trim44   | tripartite motif-containing 44                                                                    | 619.2  | 1     | 0.94 | 0.08 |
| 68010_at  | 68010  | Bambi    | BMP and activin membrane-bound inhibitor, homolog (Xenopus laevis)                                | 561.81 | 1.01  | 0.94 | 0.15 |
| 57376_at  | 57376  | Smarce1  | SWI/SNF related, matrix associated, actin dependent regulator of chromatin, subfamily e, member 1 | 1552.2 | -1.01 | 0.94 | 0.17 |

|           |        |         |                                                          |        |    |      |      |
|-----------|--------|---------|----------------------------------------------------------|--------|----|------|------|
| 14701_at  | 14701  | Gng12   | guanine nucleotide binding protein (G protein), gamma 12 | 910.56 | 1  | 0.95 | 0.09 |
| 66923_at  | 66923  | Pbrm1   | polybromo 1                                              | 1170.4 | 1  | 0.95 | 0.08 |
| 56364_at  | 56364  | Zmym3   | zinc finger, MYM-type 3                                  | 262.21 | 1  | 0.95 | 0.09 |
| 170770_at | 170770 | Bbc3    | BCL2 binding component 3                                 | 65.47  | -1 | 0.96 | 0.11 |
| 224997_at | 224997 | Dlgap1  | discs, large (Drosophila) homolog-associated protein 1   | 38.17  | -1 | 0.96 | 0.1  |
| 140810_at | 140810 | Ttbk2   | tau tubulin kinase 2                                     | 285.76 | 1  | 0.97 | 0.08 |
| 93690_at  | 93690  | Gpr45   | G protein-coupled receptor 45                            | 46.94  | 1  | 0.97 | 0.11 |
| 71834_at  | 71834  | Zbtb43  | zinc finger and BTB domain containing 43                 | 359.92 | -1 | 0.97 | 0.11 |
| 19267_at  | 19267  | Ptpre   | protein tyrosine phosphatase, receptor type, E           | 117.62 | -1 | 0.97 | 0.08 |
| 15245_at  | 15245  | Hhip    | Hedgehog-interacting protein                             | 27.97  | 1  | 0.98 | 0.08 |
| 81000_at  | 81000  | Rad54l2 | RAD54 like 2 (S. cerevisiae)                             | 238.57 | 1  | 0.99 | 0.09 |
| 26965_at  | 26965  | Cul1    | cullin 1                                                 | 1296.2 | 1  | 0.99 | 0.08 |
| 19212_at  | 19212  | Pter    | phosphotriesterase related                               | 340.81 | -1 | 0.99 | 0.1  |
| 12753_at  | 12753  | Clock   | circadian locomotor output cycles kaput                  | 981.35 | -1 | 1    | 0.1  |
